1       The iron-dependent repressor YtgR regulates the tryptophan  
2 salvage pathway through a bipartite mechanism of transcriptional  
3 control in *Chlamydia trachomatis*

4  
5           Nick D. Pokorzynski<sup>1</sup>, Amanda J. Brinkworth<sup>1</sup> and Rey A. Carabeo<sup>1</sup>

6  
7           <sup>1</sup>Center for Reproductive Biology, School of Molecular Biosciences, College of  
8 Veterinary Medicine, Washington State University, Pullman, WA, USA, 99164.

9  
10  
11  
12  
13

14 **Corresponding Author:**

15 Rey A. Carabeo

16 1770 NE Stadium Way, Biotechnology & Life Sciences Bldg., Washington State

17 University

18 Pullman, WA, 99164

19 (509) 335-7788

20 [rey.carabeo@wsu.edu](mailto:rey.carabeo@wsu.edu)

21 **Keywords:** stress response, transcription, tryptophan biosynthesis, iron-dependent  
22 regulation, repression

23 **Abstract (Word Limit:150, Word Count:150)**

24 During infection, pathogens are starved of essential nutrients such as iron and  
25 tryptophan by host immune effectors. Without conserved global stress response  
26 regulators, how the obligate intracellular bacterium *Chlamydia trachomatis* arrives at a  
27 physiologically similar “persistent” state in response to starvation of either nutrient  
28 remains unclear. Here, we report on the iron-dependent regulation of the *trpRBA*  
29 tryptophan salvage pathway in *C. trachomatis*. Iron starvation specifically induces *trpBA*  
30 expression from a novel promoter element within an intergenic region flanked by *trpR*  
31 and *trpB*. YtgR, the only known iron-dependent regulator in *Chlamydia*, can bind to the  
32 *trpRBA* intergenic region upstream of the alternative *trpBA* promoter to repress  
33 transcription. Simultaneously, YtgR binding promotes the termination of transcripts from  
34 the primary promoter upstream of *trpR*. This is the first description of an iron-dependent  
35 mechanism regulating prokaryotic tryptophan biosynthesis that may indicate the  
36 existence of novel approaches to gene regulation and stress response in *Chlamydia*.

37

38

39

40

41

42

43

44

45

## 46 **Introduction**

47 Nutrient acquisition is critical for the success of pathogenic bacteria. Many  
48 pathogenic bacteria must siphon nutrients from their hosts, such as nucleotides, amino  
49 acids and biometals (Brown, Palmer, & Whiteley, 2008; Eisenreich, Dandekar,  
50 Heesemann, & Goebel, 2010; Ray, Marteyn, Sansonetti, & Tang, 2009; Skaar, 2010).  
51 This common feature among pathogens renders them susceptible to nutrient limitation  
52 strategies associated with the host immune response (Hood & Skaar, 2012).  
53 Counteractively, bacterial pathogens have evolved sophisticated molecular mechanisms  
54 to respond to nutrient deprivation, involving increasingly complex and sophisticated  
55 nutrient-sensing regulatory networks. These stress response mechanisms are essential  
56 for pathogens to avoid clearance by the immune system. By delineating their function at  
57 the molecular level, we can better target aspects of the host-pathogen interface suitable  
58 for therapeutic manipulation. However, stress responses in the obligate intracellular  
59 bacterium *Chlamydia trachomatis* are relatively poorly characterized, leaving  
60 unanswered many fundamental questions about the biology of this pathogen.

61 *Chlamydia trachomatis* is the leading cause of bacterial sexually transmitted  
62 infections (STIs) and infection-derived preventable blindness worldwide (CDC, 2017;  
63 Newman et al., 2015; H. R. Taylor, Burton, Haddad, West, & Wright, 2014). Genital  
64 infections of chlamydia disproportionately affect women and are associated with serious  
65 sequelae in the female reproductive tract such as tubal factor infertility (Hafner, 2015).  
66 Chlamydiae are Gram-negative bacterial parasites that develop within a pathogen-  
67 specified membrane-bound organelle termed the inclusion (Moore & Ouellette, 2014).  
68 Chlamydial development is uniquely characterized by a biphasic interconversion of an

69 infectious elementary body (EB) with a non-infectious, but replicative reticulate body  
70 (RB) (AbdelRahman & Belland, 2005). An obligate intracellular lifestyle has led to  
71 reductive genome evolution across chlamydial species; Chlamydiae have retained  
72 genes uniquely required for their survival, but have become nutritionally dependent on  
73 their hosts by discarding many metabolism-related genes (Clarke, 2011). Of note, *C.*  
74 *trachomatis* does not possess genes necessary for eliciting a stringent response to  
75 nutrient starvation (*e.g. relA, spoT*), suggesting that this pathogen may utilize novel  
76 mechanisms to respond to nutrient stress (Stephens et al., 1998).

77         It is well established that in response to various stressors, Chlamydiae deviate  
78 from their normal developmental program to initiate an aberrant developmental state,  
79 termed “persistence” (Wyrick, 2010). This persistent state is distinguished by the  
80 presence of viable, but non-cultivable, abnormally enlarged chlamydial organisms that  
81 display dysregulated gene expression. Importantly, *Chlamydia* can be reactivated from  
82 persistence by abatement of the stress condition. As such, chlamydial persistence at  
83 least superficially resembles a global stress response mechanism. Yet the molecular  
84 underpinnings of this phenotype are poorly understood, with most published studies  
85 focusing on the molecular and metabolic character of the aberrant, persistent form. It is  
86 therefore unclear to what extent primary stress responses contribute to the global  
87 persistent phenotype in *Chlamydia*.

88         The best described inducer of persistence is the pro-inflammatory cytokine  
89 interferon-gamma (IFN- $\gamma$ ). The bacteriostatic effect of IFN- $\gamma$  has been primarily  
90 attributed to host cell tryptophan (Trp) catabolism, an amino acid for which *C.*  
91 *trachomatis* is auxotrophic (Byrne, Lehmann, & Landry, 1986; Fehlner-Gardiner et al.,

92 2002; M. W. Taylor & Feng, 1991). Following IFN- $\gamma$  stimulation, infected host cells up-  
93 regulate expression of indoleamine-2,3-dioxygenase (IDO1), which catabolizes Trp to  
94 *N*-formylkynurenine via cleavage of the indole ring (Macchiarulo, Camaioni, Nuti, &  
95 Pellicciari, 2009). *C. trachomatis* cannot recycle kynurenines, unlike some other  
96 chlamydial species (Wood, Roshick, & McClarty, 2004), and thus IFN- $\gamma$  stimulation  
97 effectively results in Trp starvation to *C. trachomatis*. The primary regulatory response  
98 to Trp starvation in *C. trachomatis* is mediated by a TrpR ortholog, whose Trp-  
99 dependent binding to cognate promoter elements represses transcription (Akers & Tan,  
100 2006; Carlson, Wood, Roshick, Caldwell, & McClarty, 2006). This mechanism of  
101 regulatory control is presumably limited in *C. trachomatis*, as homologs of genes  
102 regulated by TrpR in other bacteria (*e.g.* *trpF*, *aroH*, *aroL*) have not been shown to  
103 respond to Trp limitation (Wood et al., 2003).

104 In many Gram-negative bacteria, such as *Escherichia coli*, *trpR* is monocistronic  
105 and distal to the Trp biosynthetic operon. In *C. trachomatis*, TrpR is encoded in an  
106 operon, *trpRBA*, which also contains the Trp synthase  $\alpha$ - and  $\beta$ - subunits (TrpA and  
107 TrpB, respectively), and possesses a 351 base-pair (bp) intergenic region (IGR) that  
108 separates *trpR* from *trpBA*. The functional significance of the *trpRBA* IGR is poorly  
109 characterized. While a putative TrpR operator sequence was identified in the IGR  
110 overlapping an alternative transcriptional origin for *trpBA* (Carlson et al., 2006), TrpR  
111 binding was not shown (Akers & Tan, 2006). Based on *in silico* predictions, an  
112 attenuator sequence has been annotated within the *trpRBA* IGR (Merino & Yanofsky,  
113 2005), but this has not been thoroughly validated experimentally. Regardless, the IGR is  
114 >99% conserved at the nucleotide sequence level across ocular, genital and

115 lymphogranuloma venereum (LGV) serovars of *C. trachomatis*, indicating functional  
116 importance (Carlson, Porcella, McClarty, & Caldwell, 2005; Seth-Smith et al., 2009;  
117 Stephens et al., 1998; Thomson et al., 2008). Therefore, outside of TrpR-mediated  
118 repression, the complete detail of *trpRBA* regulation remains poorly elucidated and  
119 previous reports have indicated the possibility of more complex mechanisms of  
120 regulation (Brinkworth, Wildung, & Carabeo, 2018).

121 In evaluating alternative regulatory modes of the *trpRBA* operon, an interesting  
122 consideration is the pleiotropic effects induced by IFN- $\gamma$  stimulation of infected cells.  
123 IFN- $\gamma$  is involved in many processes that limit iron and other essential biometals to  
124 intracellular pathogens as a component of host nutritional immunity (Cassat & Skaar,  
125 2013; Hood & Skaar, 2012). *Chlamydia* have a strict iron dependence for normal  
126 development, evidenced by the onset of persistence following prolonged iron limitation  
127 (Raulston, 1997). Importantly, *Chlamydia* presumably acquire iron via vesicular  
128 interactions between the chlamydial inclusion and slow-recycling transferrin (Tf)-  
129 containing endosomes (Ouellette & Carabeo, 2010). IFN- $\gamma$  is known to down-regulate  
130 transferrin receptor (TfR) expression in both monocytes and epithelial cells with  
131 replicative consequences for resident intracellular bacteria (T. F. Byrd & Horwitz, 1993;  
132 T. Byrd & Horwitz, 1989; Igietseme, Ananaba, Candal, Lyn, & Black, 1998; Nairz et al.,  
133 2008). However, iron homeostasis in *Chlamydia* is poorly understood due to the lack of  
134 functionally characterized homologs to iron acquisition machinery that are highly  
135 conserved in other bacteria (Pokorzynski, Thompson, & Carabeo, 2017). Only the  
136 *ytgABCD* operon, encoding a metal permease, has been clearly linked to iron  
137 acquisition (J. D. Miller, Sal, Schell, Whittimore, & Raulston, 2009). Intriguingly, the

138 YtgC (CTL0325) open reading frame (ORF) encodes a N-terminal permease domain  
139 fused to a C-terminal DtxR-like repressor domain, annotated YtgR (Akers, HoDac,  
140 Lathrop, & Tan, 2011; Thompson, Nicod, Malcolm, Grieshaber, & Carabeo, 2012). YtgR  
141 is cleaved from the permease domain during infection and functions as an iron-  
142 dependent transcriptional repressor to autoregulate the expression of its own operon  
143 (Thompson et al., 2012). YtgR represents the only identified iron-dependent  
144 transcriptional regulator in *Chlamydia*. Whether YtgR maintains a more diverse  
145 transcriptional regulon beyond the *ytgABCD* operon has not yet been addressed and  
146 remains an intriguing question in the context of immune-mediated iron limitation to *C.*  
147 *trachomatis*.

148         Consistent with the highly reduced capacity of the chlamydial genome, it is likely  
149 that *C. trachomatis* has a limited ability to tailor a specific response to each individual  
150 stress. In the absence of identifiable homologs for most global stress response  
151 regulators in *C. trachomatis*, we hypothesized that primary stress responses to  
152 pleiotropic insults may involve mechanisms of regulatory integration, whereby important  
153 molecular pathways are co-regulated by stress-responsive transcription factors such  
154 that they can be utilized across multiple host-mediated stresses. Here, we report on the  
155 unique iron-dependent regulation of the *trpRBA* operon in *Chlamydia trachomatis*. We  
156 propose a model of iron-dependent transcriptional regulation of *trpRBA* mediated by the  
157 repressor YtgR binding specifically to the IGR, which may have implications for how *C.*  
158 *trachomatis* responds to immunological and environmental insults. Such a mechanism  
159 of iron-dependent regulation of Trp biosynthesis has not been previously described in  
160 any other prokaryote and adds to the catalog of regulatory models for Trp biosynthetic

161 operons in bacteria. Further, it reveals a highly dynamic mode of regulatory integration  
162 within the *trpRBA* operon, employing bipartite control at the transcription initiation and  
163 termination steps.

## 164 **Results**

165 **Brief iron limitation via 2,2-bipyridyl treatment yields iron-starved, but non-**  
166 **persistent *Chlamydia trachomatis*.** To identify possible instances of regulatory  
167 integration between iron and Trp starvation in *C. trachomatis*, we optimized a stress  
168 response condition that preceded the development of a characteristically persistent  
169 phenotype. We reasoned that in order to effectively identify regulatory integration, we  
170 would need to investigate the bacterium under stressed, but not aberrant, growth  
171 conditions such that we could distinguish primary stress responses from abnormal  
172 growth. To specifically investigate the possible contribution of iron limitation to a broader  
173 immunological (e.g. IFN- $\gamma$ -mediated) stress, we utilized the membrane-permeable iron  
174 chelator 2,2-bipyridyl (Bpdl), which has the advantage of rapidly and homogeneously  
175 starving *C. trachomatis* of iron (Thompson & Carabeo, 2011). We chose to starve *C.*  
176 *trachomatis* serovar L2 of iron starting at 12 hrs post-infection (hpi), or roughly at the  
177 beginning of mid-cycle growth. At this point the chlamydial organisms represent a  
178 uniform population of replicative RBs that are fully competent, both transcriptionally and  
179 translationally, to respond to stress. We treated infected HeLa cell cultures with 100  $\mu$ M  
180 Bpdl or mock for either 6 or 12 hours (hrs) to determine a condition sufficient to limit iron  
181 to *C. trachomatis* without inducing hallmark persistent phenotypes. We stained infected  
182 cells seeded on glass coverslips with convalescent human sera and analyzed  
183 chlamydial inclusion morphology under both Bpdl- and mock-treated conditions by laser



184 point-scanning confocal microscopy (Figure 1A). Following 6 hrs of Bpdl treatment,  
185 chlamydial inclusions were largely indistinguishable from mock-treated inclusions,  
186 containing a homogeneous population of larger organisms, consistent with RBs in mid-  
187 cycle growth. However, by 12 hrs of Bpdl treatment, the inclusions began to display  
188 signs of aberrant growth: they were perceptibly smaller, more comparable in size to 18  
189 hpi, and contained noticeably fewer organisms, perhaps indicating a delay in RB-to-EB  
190 differentiation. These observations were consistent with our subsequent analysis of  
191 genome replication by quantitative PCR (qPCR; Figure 1B.) At 6 hrs of Bpdl treatment,  
192 there was no statistically distinguishable difference in genome copy number when  
193 compared to the equivalent mock-treated time-point. However, by 12 hrs of treatment,  
194 genome copy number was significantly reduced 4.7-fold in the Bpdl-treated group  
195 relative to mock-treatment ( $p = 0.0033$ ). We then assayed the transcript expression of  
196 two markers for persistence by reverse transcription quantitative PCR (RT-qPCR): the  
197 early gene *euo*, encoding a transcriptional repressor of late-cycle genes (Figure 1C),  
198 and the adhesin *omcB*, which is expressed late in the developmental cycle (Figure 1D).  
199 Characteristic persistence would display elevated *euo* expression late into infection, and  
200 suppressed *omcB* expression throughout development. We observed that at 6 hrs of  
201 Bpdl treatment, there was no statistically distinguishable difference in either *euo* or  
202 *omcB* expression when compared to the mock-treatment. Still at 12 hrs of Bpdl  
203 treatment, *euo* expression was unchanged. However, *omcB* expression was  
204 significantly induced following 12 hrs of Bpdl-treatment ( $p = 0.00015$ ). This was  
205 unexpected, but we note that *omcB* expression has been shown to vary between  
206 chlamydial serovars and species when starved for iron (Pokorzynski et al., 2017).

207 Collectively, these data indicated that 6 hrs of Bpdl treatment was a more suitable time-  
208 point at which to monitor iron-limited stress responses.

209 We additionally assayed these same metrics following 6 or 12 hrs of Trp  
210 starvation by culturing cells in either Trp-replete or Trp-deplete DMEM-F12 media  
211 supplemented with fetal bovine serum (FBS) pre-dialyzed to remove amino acids. We  
212 observed no discernable change in inclusion morphology out to 12 hrs of Trp starvation  
213 (Figure 1 – Figure Supplement 1A), but genome copy numbers were significantly  
214 reduced 2.7-fold at this time-point ( $p = 0.00612$ ; Figure 1 – Figure Supplement 1B). The  
215 transcript expression of *euo* (Figure 1 – Figure Supplement 1C) and *omcB* (Figure 1 –  
216 Figure Supplement 1D) did not significantly change at either treatment duration, but Trp-  
217 depletion did result in a 2.0-fold reduction in *omcB* expression, consistent with a more  
218 characteristic persistent phenotype. These data therefore also indicated that 6 hrs of  
219 treatment would be ideal to monitor non-persistent responses to Trp limitation.

220

221

222

223

224

225

226

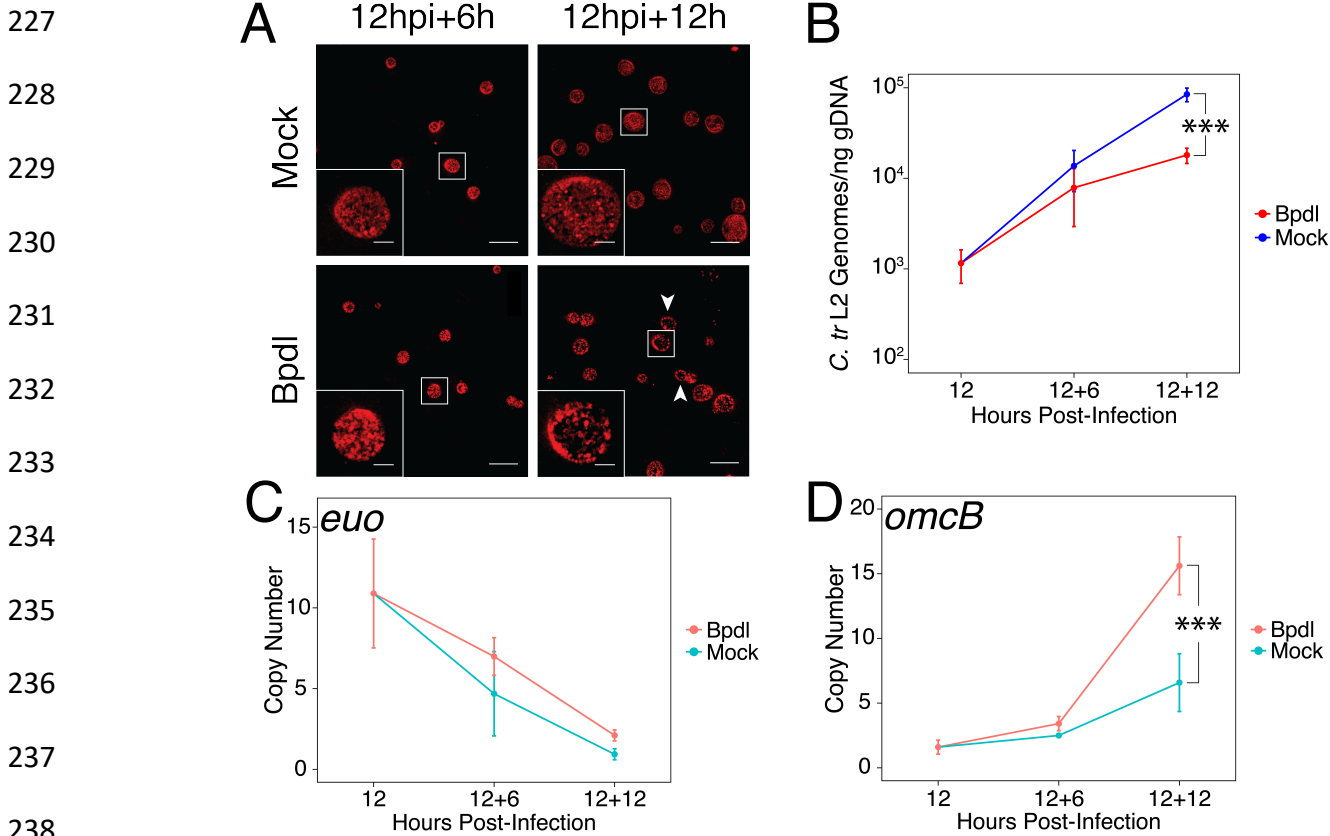

239

240 **Figure 1.** Brief iron limitation via 2,2-bipyridyl treatment precedes the onset of  
 241 characteristic chlamydial persistence. (A) *C. trachomatis* L2-infected HeLa cells were  
 242 fixed and stained with convalescent human sera to image inclusion morphology by  
 243 confocal microscopy following Bpdl treatment at the indicated times post-infection.  
 244 Arrowheads indicate inclusions with visibly fewer organisms in the 12-hour Bpdl-treated  
 245 condition. Figure shows representative experiment of three biological replicates. Scale  
 246 bar = 25  $\mu$ m, Inset scale bar = 5  $\mu$ m. (B) Genomic DNA (gDNA) was harvested from  
 247 infected HeLa cells at the indicated times post-infection under iron-replete (blue) and -  
 248 deplete (red) conditions. Chlamydial genome copy number was quantified by qPCR.  
 249 Chlamydial genome replication is stalled following 12 hours of Bpdl treatment, but not 6.  
 250 N=2. (C) Total RNA was harvested from infected HeLa cells at the indicated times post-  
 251 infection under iron-replete (teal) and -deplete (orange) conditions. The transcript  
 252 abundance of hallmark persistence genes *euo* and (D) *omcB* were quantified by RT-  
 253 qPCR and normalized against genome copy number. Only at 12 hours of Bpdl  
 254 treatment is *omcB* expression significantly affected. N=3 for 12+6, N=2 for 12+12.  
 255 Statistical significance was determined by One-Way ANOVA followed by post-hoc  
 256 pairwise *t*-tests with Bonferroni's correction for multiple comparisons. \* =  $p < 0.05$ , \*\* =  $p$   
 257 < 0.01, \*\*\* =  $p < 0.005$ .

258           We next sought to determine whether our brief 6-hr Bpdl treatment was sufficient  
259 to elicit a transcriptional iron starvation phenotype. We chose to analyze the expression  
260 of three previously identified iron-regulated transcripts, *ytgA* (Figure 2A), *ahpC* (Figure  
261 2B) and *devB* (Figure 2C), by RT-qPCR under Bpdl- and mock-treated conditions (Dill,  
262 Dessus-Babus, & Raulston, 2009; Thompson & Carabeo, 2011). In addition, we  
263 analyzed the expression of one non-iron-regulated transcript, *dnaB* (Figure 2D), as a  
264 negative control (Brinkworth et al., 2018). Following 6 hrs of Bpdl treatment, we  
265 observed that the transcript expression of the periplasmic iron-binding protein *ytgA* was  
266 significantly elevated 1.75-fold relative to the equivalent mock-treated time-point ( $p =$   
267 0.0052). However, we did not observe induction of *ytgA* transcript expression relative to  
268 the 12 hpi time-point. We distinguish here between *elevated* and *induced* transcript  
269 expression, as chlamydial gene expression is highly developmentally regulated. Thus, it  
270 can be more informative to monitor longitudinal expression of genes, *i.e.* their induction,  
271 as opposed to elevation relative to an equivalent control time-point, which may simply  
272 represent a stall in development. While we did not observe induction of *ytgA*, which  
273 would be more consistent with an iron-starved phenotype, we reason that this is a  
274 consequence of the brief treatment period, and that longer iron starvation would  
275 produce a more robust induction of iron-regulated transcripts. Note that the identification  
276 of *ytgA* as iron-regulated has only been previously observed following extended periods  
277 of iron chelation (J. D. Miller et al., 2009; Raulston et al., 2007; Thompson & Carabeo,  
278 2011). Similarly, we observed that the transcript expression of the thioredoxin *ahpC* was  
279 significantly elevated 2.15-fold relative to the equivalent mock-treated time-point ( $p =$   
280 0.038) but was not induced relative to the 12 hpi time-point. The transcript expression of

281 *devB*, encoding a 6-phosphogluconolactonase involved in the pentose phosphate  
282 pathway, was not observed to significantly respond to our brief iron limitation condition,  
283 suggesting that it is not a component of the primary iron starvation stress response in *C.*  
284 *trachomatis*. As expected, the transcript expression of *dnaB*, a replicative DNA helicase,  
285 was not altered by our iron starvation condition, consistent with its presumably iron-  
286 independent regulation (Brinkworth et al., 2018). Overall, these data confirmed that our  
287 6-hr Bpdl treatment condition was suitable to produce a mild iron starvation phenotype  
288 at the transcriptional level, thus facilitating our investigation of iron-dependent regulatory  
289 integration.

290

291

292

293

294

295

296

297

298

299

300

301

302

303  
304  
305  
306  
307  
308  
309  
310  
311  
312  
313  
314  
315  
316  
317  
318  
319  
320

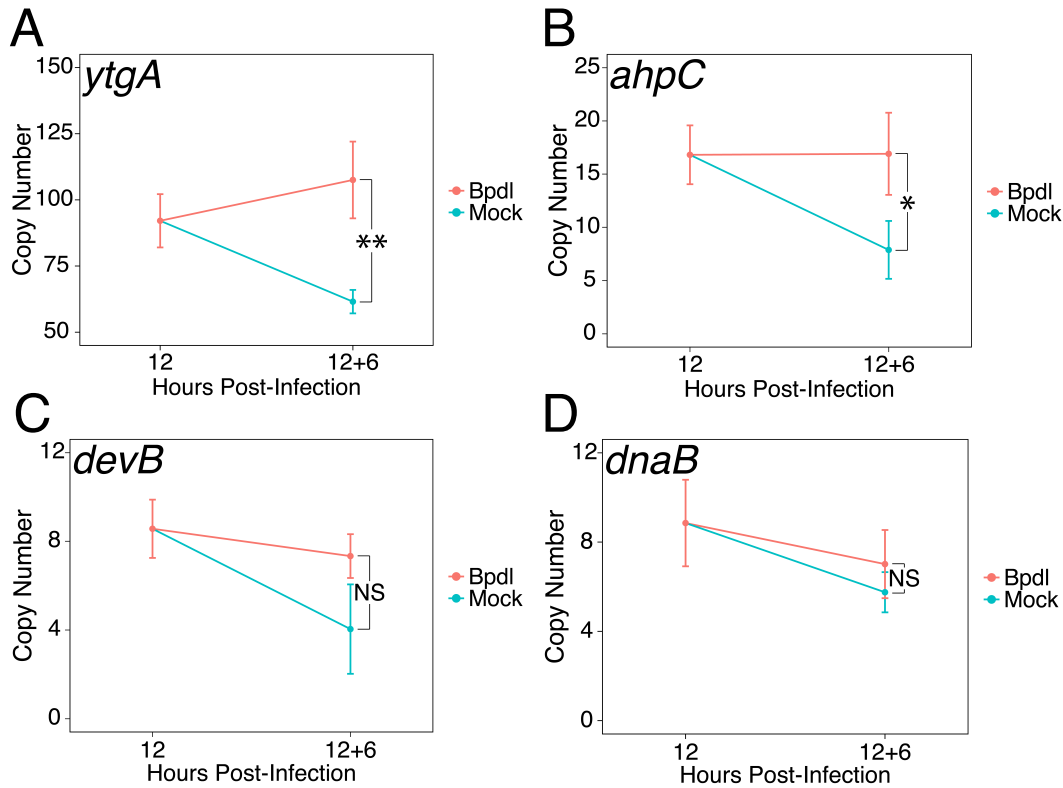

321 **Figure 2.** Brief iron limitation condition produces mild iron-starved transcriptional  
322 phenotype. (A) Total RNA and gDNA was harvested from infected HeLa cells at the  
323 indicated times post-infection under iron-replete (teal) and -deplete (orange) conditions.  
324 The transcript abundance of iron-regulated *ytgA*, (B) *ahpC*, (C) *devB* and (D) non-iron  
325 regulated *dnaB* were quantified by RT-qPCR and normalized against genome copy  
326 number. The transcript expression of *ytgA* and *ahpC* were significantly elevated  
327 following 6-hour Bpdl treatment, indicative of iron starvation to *C. trachomatis*. N=3.  
328 Statistical significance was determined by One-Way ANOVA followed by post-hoc  
329 pairwise *t*-tests with Bonferroni's correction for multiple comparisons. \* =  $p < 0.05$ , \*\* =  $p$   
330  $< 0.01$ , \*\*\* =  $p < 0.005$ .

331 **Transcript expression of the *trpRBA* operon is differentially regulated by iron in**  
332 ***Chlamydia trachomatis*.** Upon identifying an iron limitation condition that produced a  
333 relevant transcriptional phenotype while avoiding the onset of persistent development,  
334 we aimed to investigate whether the immediate response to iron starvation in *C.*  
335 *trachomatis* would result in the consistent induction of pathways unrelated to iron  
336 utilization/acquisition, but nevertheless important for surviving immunological stress.  
337 The truncated Trp biosynthetic operon, *trpRBA* (Figure 3A), has been repeatedly linked  
338 to the ability of genital and LGV serovars (D-K and L1-3, respectively) of *C. trachomatis*  
339 to counter IFN- $\gamma$ -mediated stress. This is due to the capacity of the chlamydial Trp  
340 synthase in these serovars to catalyze the  $\beta$  synthase reaction, *i.e.* the condensation of  
341 indole to the amino acid serine to form Trp (Fehlner-Gardiner et al., 2002). In the  
342 presence of exogenous indole, *C. trachomatis* is therefore able to biosynthesize Trp  
343 such that it can prevent the development of IFN- $\gamma$ -mediated persistence.  
344 Correspondingly, the expression of *trpRBA* is highly induced following IFN- $\gamma$  stimulation  
345 of infected cells (Belland et al., 2003; Østergaard et al., 2016). These data have  
346 historically implicated Trp starvation as the primary mechanism by which persistence  
347 develops in *C. trachomatis* following exposure to IFN- $\gamma$ . However, these studies have  
348 routinely depended on prolonged treatment conditions that monitor the terminal effect of  
349 persistent development, as opposed to the immediate molecular events which may  
350 have important roles in the developmental fate of *Chlamydia*. As such, these studies  
351 may have missed the contribution of other IFN- $\gamma$ -stimulated insults such as iron  
352 limitation.

353 To decouple Trp limitation from iron limitation and assess their relative  
354 contribution to regulating a critical pathway for responding to IFN- $\gamma$ -mediated stress, we  
355 monitored the transcript expression of the *trpRBA* operon under brief Trp or iron  
356 starvation by RT-qPCR. When starved for Trp for 6 hrs, we observed that the  
357 expression of *trpR*, *trpB* and *trpA* were all significantly induced greater than 10.5-fold  
358 relative to 12 hpi ( $p = 0.00077$ ,  $0.025$  and  $9.7e-5$ , respectively; Figure 3B). All three  
359 ORFs were also significantly elevated relative to the equivalent mock-treated time-point  
360 ( $p = 0.00076$ ,  $0.025$  and  $9.7e-5$ , respectively). This result was surprising with respect to  
361 the relative immediacy of operon induction in response to our Trp starvation protocol,  
362 confirming the relevant Trp-starved transcriptional phenotype. To induce Trp-deprived  
363 persistence in *C. trachomatis*, many laboratories rely on compounded techniques of  
364 IFN- $\gamma$  pre-treatment to deplete host Trp pools in conjunction with culturing in Trp-  
365 depleted media, among other strategies. While the phenotypic end-point differs here, it  
366 is nonetheless interesting to note that only 6 hrs of media replacement is sufficient to  
367 markedly up-regulate *trpRBA* expression. This suggests that *C. trachomatis* has a  
368 highly attuned sensitivity to even moderate changes in Trp levels.

369 We next performed the same RT-qPCR analysis on the expression of the *trpRBA*  
370 operon in response to 6 hrs of iron limitation via Bpdl treatment (Figure 3C). While we  
371 observed that the transcript expression of all three ORFs was significantly elevated at  
372 least 2.1-fold relative to the equivalent mock-treated time-point ( $p = 0.015$ ,  $0.00098$  and  
373  $0.0062$ , respectively), we made the intriguing observation that only the expression of  
374 *trpB* and *trpA* was significantly induced relative to 12 hpi ( $p = 0.00383$  and  $0.0195$ ,  
375 respectively). The significant induction of *trpBA* expression, but not *trpR* expression,



376 suggested that *trpBA* are specifically regulated by iron availability. This result is  
377 consistent with a recent survey of the iron-regulated transcriptome in *C. trachomatis* by  
378 RNA-Sequencing, which also reported that iron-starved *Chlamydia* specifically up-  
379 regulate *trpBA* expression in the absence of altered *trpR* expression (Brinkworth et al.,  
380 2018). Our results expand on this finding by providing a more detailed investigation into  
381 the specific profile of this differential regulation of *trpRBA* in response to iron  
382 deprivation. Taken together, these findings demonstrate that an important stress  
383 response pathway, the *trpRBA* operon, is regulated by the availability of both Trp and  
384 iron, consistent with the notion that the pathway may be cooperatively regulated to  
385 respond to various stress conditions. Notably, iron-dependent regulation of Trp  
386 biosynthesis has not been previously documented in other prokaryotes.

387

388

389

390

391

392

393

394

395

396

397

398

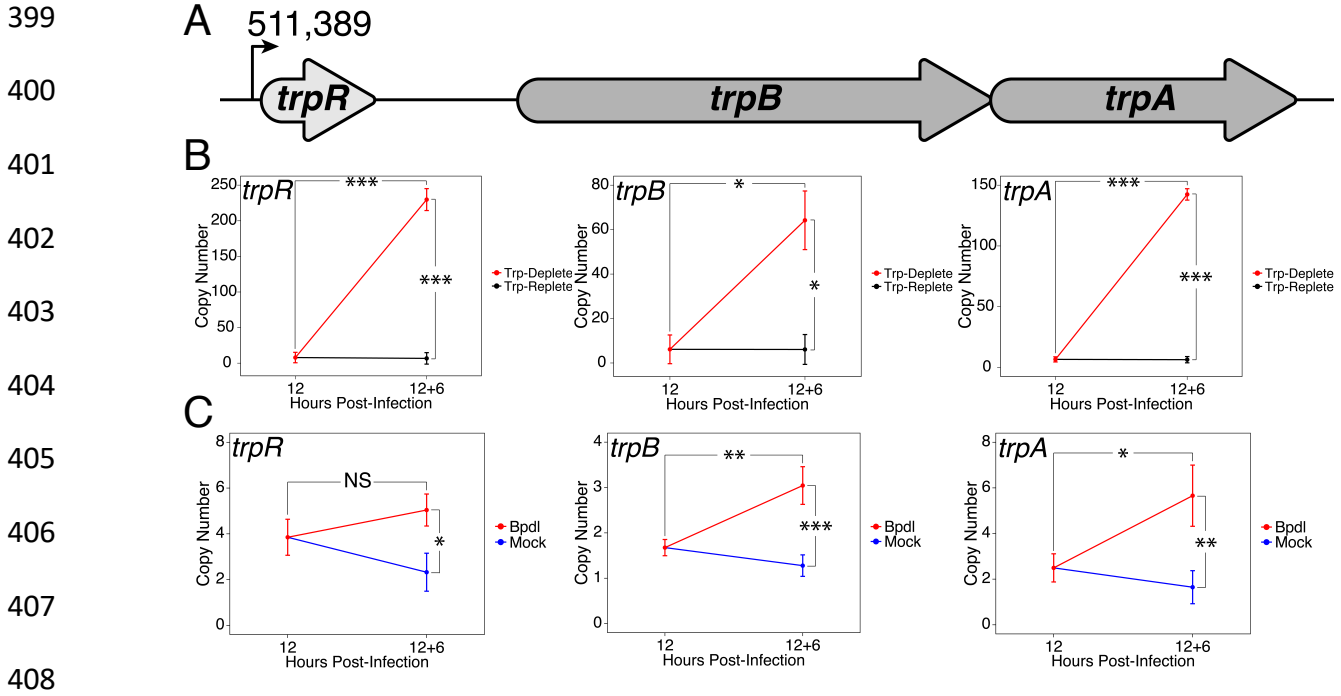

415 **Figure 3.** Expression of the *trpRBA* operon in *C. trachomatis* is differentially regulated  
 416 by brief iron limitation. (A) Cartoon depiction of the *trpRBA* operon (drawn to scale) with  
 417 the primary transcriptional start site upstream of *trpR* annotated. (B) Total RNA and  
 418 gDNA were harvested from infected HeLa cells at the indicated times post-infection  
 419 under Trp-replete (black) and -deplete (red) conditions. The transcript expression of  
 420 *trpRBA* operon was quantified by RT-qPCR and normalized against genome copy  
 421 number. All three ORFs are significantly induced relative to 12 hpi following Trp  
 422 starvation. N=2. (C) Total RNA and gDNA were harvested from infected HeLa cells at  
 423 the indicated times post-infection under iron-replete (blue) and -deplete (red) conditions.  
 424 The transcript expression of *trpRBA* operon was quantified by RT-qPCR and normalized  
 425 against genome copy number. Only *trpB* and *trpA* expression was significantly induced  
 426 relative to 12 hpi. N=3. Statistical significance was determined by One-Way ANOVA  
 427 followed by post-hoc pairwise *t*-tests with Bonferroni's correction for multiple  
 428 comparisons. \* =  $p < 0.05$ , \*\* =  $p < 0.01$ , \*\*\* =  $p < 0.005$ .

429 **Specific iron-regulated expression of *trpBA* originates from a novel alternative**  
430 **transcriptional start site within the *trpRBA* intergenic region.** We hypothesized that  
431 the specific iron-related induction of *trpBA* expression relative to *trpR* expression may  
432 be attributable to an iron-regulated alternative transcriptional start site (alt. TSS)  
433 downstream of the *trpR* ORF. Indeed, a previous study reported the presence of an alt.  
434 TSS in the *trpRBA* IGR, located 214 nucleotides upstream of the *trpB* translation start  
435 position (Carlson et al., 2006). However, a parallel study could not identify a TrpR  
436 binding site in the *trpRBA* IGR (Akers & Tan, 2006). We reasoned that a similar alt. TSS  
437 may exist in the IGR that controlled the iron-dependent expression of *trpBA*. We  
438 therefore performed Rapid Amplification of 5'-cDNA Ends (5'-RACE) on RNA isolated  
439 from *C. trachomatis* L2-infected HeLa cells using the SMARTer 5'/3' RACE Kit workflow  
440 (Takara Bio). Given the low expression of the *trpRBA* operon during normal  
441 development, we utilized two sequential gene-specific amplification steps (nested 5'-  
442 RACE) to identify 5' cDNA ends in the *trpRBA* operon. These nested RACE conditions  
443 resulted in amplification that was specific to infected-cells (Figure 4 – Figure  
444 Supplement 1A). Using this approach, we analyzed four conditions: 12 hpi, 18 hpi, 12  
445 hpi + 6 hrs of Bpdl treatment, and 12 hpi + 6 hrs of Trp-depletion (Figure 4A). We  
446 observed three RACE products that migrated with an apparent size of 1.5, 1.1 and 1.0  
447 kilobases (kb). At 12 and 18 hpi, all three RACE products exhibited low abundance,  
448 even following the nested PCR amplification. This observation was consistent with the  
449 expectation that the expression of the *trpRBA* operon is very low under normal, iron and  
450 Trp-replete conditions. However, we note that the 6-hr difference in development did  
451 appear to alter the representation of the 5' cDNA ends, which may suggest a stage-

452 specific promoter utilization within the *trpRBA* operon. In our Trp starvation condition,  
453 we observed an apparent increase in the abundance of the 1.5 kb RACE product, which  
454 was therefore presumed to represent the primary TSS upstream of *trpR*, at nucleotide  
455 position 511,389 (*C. trachomatis* L2 434/Bu). Interestingly, the 1.0 kb product displayed  
456 a very similar apparent enrichment following Bpdl treatment, suggesting that this RACE  
457 product represented a specifically iron-regulated TSS. Both the 1.5 and 1.0 kb RACE  
458 products were detectable in the Trp-depleted and iron-depleted conditions, respectively,  
459 during the primary RACE amplification, consistent with their induction under these  
460 conditions (Figure 4 – Figure Supplement 1B).

461         If iron depletion was inducing *trpBA* expression independent of *trpR*, we  
462 reasoned that we would observe specific enrichment of *trpB* sequences in our 5'-RACE  
463 cDNA samples relative to *trpR* sequences. We again utilized RT-qPCR to quantify the  
464 abundance of *trpB* transcripts relative to *trpR* transcripts in the 5'-RACE total RNA  
465 samples (Figure 4B). In agreement with our model, only under iron starved conditions  
466 did we observe a significant enrichment of *trpB* relative to *trpR* ( $p < 0.01$ ). Additionally,  
467 we observed that at 12 and 18 hpi in iron-replete conditions, the ratio of *trpB* to *trpR* was  
468 approximately 1.0, suggesting non-preferential basal expression across the three  
469 putative TSSs. Another factor contributing to this ratio is the synthesis of the full-length  
470 *trpRBA* polycistron. In support of this, the *trpB* to *trpR* ratio remained near 1.0 under the  
471 Trp-starved condition, which would be expected during transcription read-through of the  
472 whole operon. The apparent lack of preferential promoter utilization as described above  
473 could be attributed to the relatively low basal expression of the operon at 12 and 18 hpi

474 under Trp- and iron-replete conditions, thus precluding quantitative detection of  
475 differential promoter utilization in this assay.

476 To determine the specific location of the 5' cDNA ends within the *trpRBA* operon,  
477 we isolated the 5'-RACE products across all conditions by gel extraction and cloned the  
478 products into the pRACE vector supplied by the manufacturer. We then sequenced the  
479 ligated inserts and BLASTed the sequences against the *C. trachomatis* L2 434/Bu  
480 genome to identify the location of the 5'-most nucleotides (Figure 4C). These data are  
481 displayed as a statistical approximation of the genomic regions most likely to be  
482 represented by the respective 5'-RACE products in both histogram (semi-continuous)  
483 and density plot (continuous) format (See Supplementary File 1 for a description of all  
484 mapped 5'-RACE products). As expected, the 1.5 kb product mapped in a distinct and  
485 tightly grouped peak near the previously annotated *trpR* TSS, with the mean and modal  
486 nucleotide being 511,388 and 511,389, respectively (Figure 4 – Figure Supplement 2A).  
487 Surprisingly, we found that neither the 1.1 or 1.0 kb RACE product mapped to the  
488 previously reported alt. TSS in the *trpRBA* IGR, at position 511,826. Instead, we  
489 observed that the 1.1 kb product mapped on average to nucleotide position 511,878,  
490 with the modal nucleotide being found at 511,898 (Figure 4 – Figure Supplement 2B).  
491 The 1.0 kb product mapped with a mean nucleotide position of 512,013, with the modal  
492 nucleotide being 512,005 (Figure 4 – Figure Supplement 2C), only 35 bases upstream  
493 of the *trpB* coding sequence. Interestingly, the 1.0 kb product mapped to a region of the  
494 *trpRBA* IGR flanked by consensus  $\sigma^{66}$  -10 and -35 promoter elements, found at  
495 positions 512,020-5 and 511,992-7, respectively (Ricci, Ratti, & Scarlato, 1995). These  
496 data collectively pointed toward the 1.0 kb 5'-RACE product representing a novel, iron-

497 regulated alt. TSS and *bona fide*  $\sigma^{66}$ -dependent promoter element that allows for the  
498 specific iron-dependent expression of *trpBA*.

499

500

501

502

503

504

505

506

507

508

509

510

511

512

513

514

515

516

517

518

519

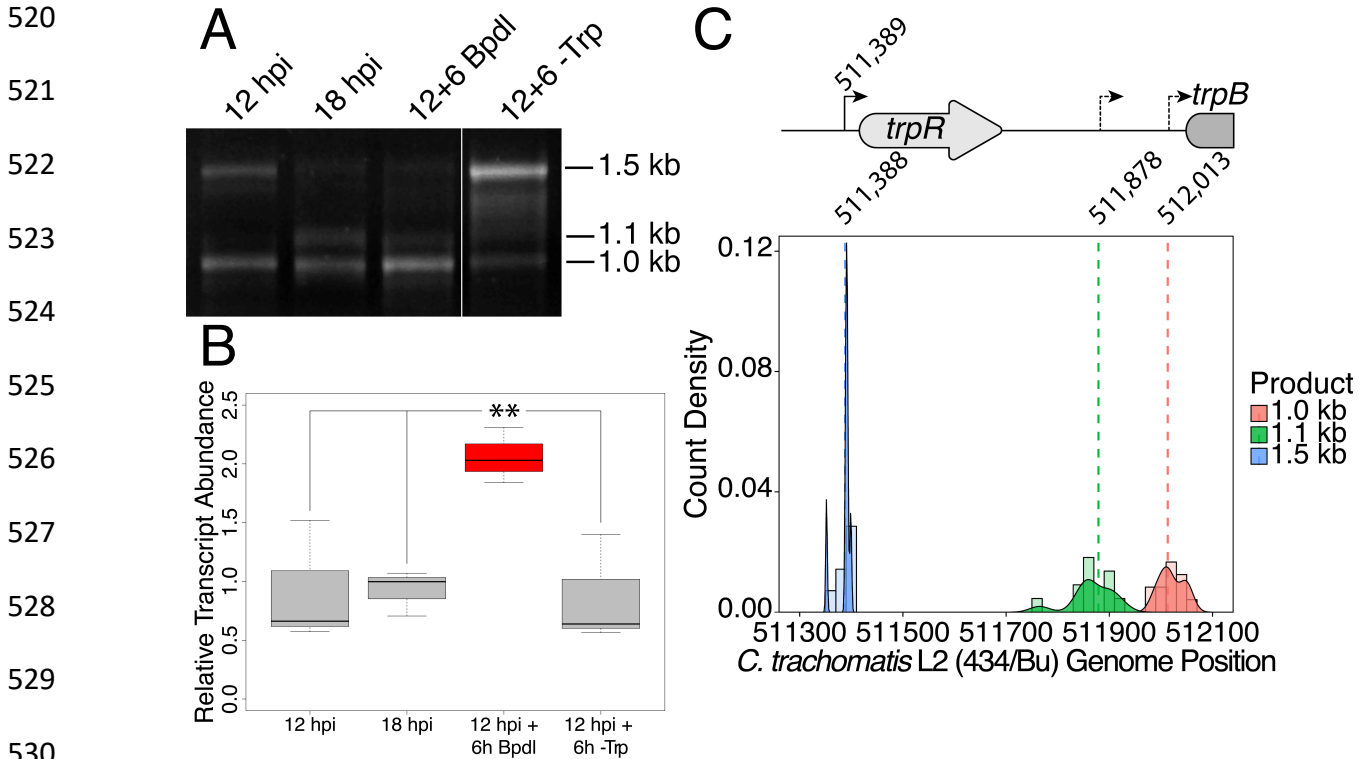

531

532 **Figure 4.** Iron-dependent induction of *trpBA* expression initiates within the *trpRBA*  
533 intergenic region from a novel alternative transcriptional start site. (A) Total RNA was  
534 harvested from infected HeLa cells at the indicated times post-infection to examine iron-  
535 dependent and Trp-dependent changes in the 5'-cDNA profile of the *trpRBA* operon by  
536 Rapid Amplification of 5' cDNA Ends (5'-RACE). RACE products were separated on an  
537 agarose gel, revealing three distinct and specific bands with apparent sizes of 1.5, 1.1  
538 and 1.0 kb. Trp depletion led to the apparent enrichment of the 1.5 kb product, while  
539 Bpdl treatment produced a similarly enriched 1.0 kb RACE product. Figure shows  
540 representative experiment of three biological replicates. (B) To confirm that iron-  
541 dependent induction of *trpBA* could originate from alternative transcription initiation, RT-  
542 qPCR was performed on 5'-RACE total RNA to quantify the abundance of *trpB*  
543 transcripts relative to *trpR*. Only under iron-limited conditions were *trpB* transcripts  
544 enriched relative to *trpR*. N=3. Statistical significance determined by One-way ANOVA  
545 followed by post-hoc pairwise *t*-tests. \* =  $p < 0.05$ , \*\* =  $p < 0.01$ , \*\*\* =  $p < 0.005$ . (C) The  
546 nucleotide position of the 5' cDNA ends generated from RACE were mapped to the *C.*  
547 *trachomatis* L2 434/Bu genome by nucleotide BLAST. Figure displays histogram (semi-  
548 continuous; bin width=20) and overlaid density plot (continuous) distribution of 5'  
549 nucleotide positions generated from each 5'-RACE product. The dotted line represents  
550 the weighted mean of the distribution, as indicated by the integer value above each line.  
551 The identified alt. TSSs are depicted on the *trpRBA* operon (drawn to scale) above the  
552 plot. N=3.

553 **YtgR specifically binds to the *trpRBA* intergenic region in an operator-dependent**  
554 **manner to repress transcription of *trpBA*.** As the only known iron-dependent  
555 transcriptional regulator in *Chlamydia*, we hypothesized that YtgR may regulate the iron-  
556 dependent expression of *trpBA* from the putative promoter element we characterized by  
557 5'-RACE. Using bioinformatic sequence analysis, we investigated whether the *trpRBA*  
558 IGR contained a candidate YtgR operator sequence. By local sequence alignment of  
559 the putative YtgR operator sequence (Akers et al., 2011) and the *trpRBA* IGR, we  
560 identified a high-identity alignment (76.9% identity) covering 67% of the putative  
561 operator sequence (Figure 5A). Interestingly, this alignment mapped to the previously  
562 identified palindrome suspected to have operator functionality (Carlson et al., 2006). By  
563 global sequence alignment of the YtgR operator to the palindromic sequence, an  
564 alignment identical to the local alignment was observed, which still displayed relatively  
565 high sequence identity (43.5% identity). We hypothesized that this sequence functioned  
566 as an YtgR operator, despite being located 184 bp upstream of the *trpBA* alt. TSS.

567 To investigate the ability of YtgR to bind and repress transcription from the  
568 putative *trpBA* promoter, we implemented a heterologous two-plasmid assay that  
569 reports on YtgR repressor activity as a function of  $\beta$ -galactosidase expression  
570 (Thompson et al., 2012). In brief, a candidate DNA promoter element was cloned into  
571 the pCCT expression vector between an arabinose-inducible pBAD promoter and the  
572 reporter gene *lacZ*. This plasmid was co-transformed into BL21 (DE3) *E. coli* along with  
573 an IPTG-inducible pET151 expression vector with (pET151-YtgR) or without (pET151-  
574 EV) the C-terminal 139 amino acid residues of CTL0325 (YtgC). Note that we have  
575 previously demonstrated that this region is a functional iron-dependent repressor



576 domain (Thompson et al., 2012). To verify the functionality of this assay, we determined  
577 whether ectopic YtgR expression could repress pCCT reporter gene expression in the  
578 presence of three candidate DNA elements: a no-insert empty vector (pCCT-EV), the  
579 putative promoter element for *C. trachomatis lpdA* (pCCT-*lpdA*), and the promoter  
580 region of the *ytgABCD* operon (pCCT-*ytgABCD*; Figure 5B). As expected, from the  
581 pCCT-EV reporter construct, ectopic YtgR expression did not significantly reduce the  
582 activity of  $\beta$ -galactosidase. Additionally, reporter gene expression from pCCT-*lpdA*,  
583 containing the promoter of iron-regulated *lpdA* (Brinkworth et al., 2018), which is not  
584 known to be YtgR-regulated, was not affected by ectopic expression of YtgR. This  
585 demonstrated that the assay can discriminate between the promoter elements of iron-  
586 regulated genes and *bona fide* YtgR targeted promoters. Indeed, in the presence of  
587 pCCT-*ytgABCD*, induction of YtgR expression produced a significant decrease in  $\beta$ -  
588 galactosidase activity ( $p = 0.03868$ ) consistent with its previously reported auto-  
589 regulation of this promoter (Thompson et al., 2012).

590 Using this same assay, we then inserted into the pCCT reporter plasmid 1) the  
591 *trpR* promoter element (pCCT-*trpR*), 2) the putative *trpBA* promoter element  
592 represented by the IGR (pCCT-*trpBA*), and 3) the same putative *trpBA* promoter  
593 element with a mutated YtgR operator sequence that was diminished for both  
594 palindromicity and A-T richness, two typical features of prokaryotic promoter elements  
595 (pCCT-*trpBA* $\Delta$ Operator; Figure 5C) (Schmitt, 2002; Tao, Boydt, & Murphy, 1992). When  
596 YtgR was ectopically expressed in the pCCT-*trpR* background, we observed no  
597 statistically distinguishable change in  $\beta$ -galactosidase activity. However, in the pCCT-  
598 *trpBA* background, ectopic YtgR expression significantly reduced  $\beta$ -galactosidase

599 activity at levels similar to those observed in the pCCT-*ytgABCD* background ( $p =$   
600 0.01219). This suggested that YtgR was capable of binding to the *trpBA* promoter  
601 element specifically. Interestingly, this repression phenotype was abrogated in the  
602 pCCT-*trpBA*ΔOperator background, where we observed no statistically meaningful  
603 difference in  $\beta$ -galactosidase activity. We subsequently addressed whether the region of  
604 the *trpRBA* IGR containing the YtgR operator site was sufficient to confer YtgR  
605 repression in this assay (Figure 5 – Figure Supplement 1). We cloned three fragments  
606 of the *trpRBA* IGR into the pCCT reporter plasmid: the first fragment represented the 5'-  
607 end of the IGR containing the operator site at the 3'-end (pCCT-IGR1), the second  
608 fragment represented a central region of the IGR containing the operator site at the 5'-  
609 end (pCCT-IGR2), and the third fragment represented the 3'-end of the IGR and did not  
610 contain the operator site (pCCT-IGR3). Surprisingly, we observed that none of these  
611 fragments alone were capable of producing a significant repression phenotype in our  
612 reporter system. This finding indicated that while the operator site was necessary for  
613 YtgR repression, it alone was not sufficient. Together, these data indicated that YtgR  
614 could bind to the *trpBA* promoter element and that this binding was dependent upon an  
615 intact AT-rich palindromic sequence, likely representing an YtgR operator, but that  
616 further structural elements in the *trpRBA* IGR may be necessary for repression.  
617 Nonetheless, we demonstrated the existence of a functional YtgR binding site that  
618 conferred iron-dependent transcriptional regulation to *trpBA*, independent of the major  
619 *trpR* promoter.

620

621

622  
623  
624  
625  
626  
627  
628  
629  
630  
631  
632  
633  
634  
635  
636

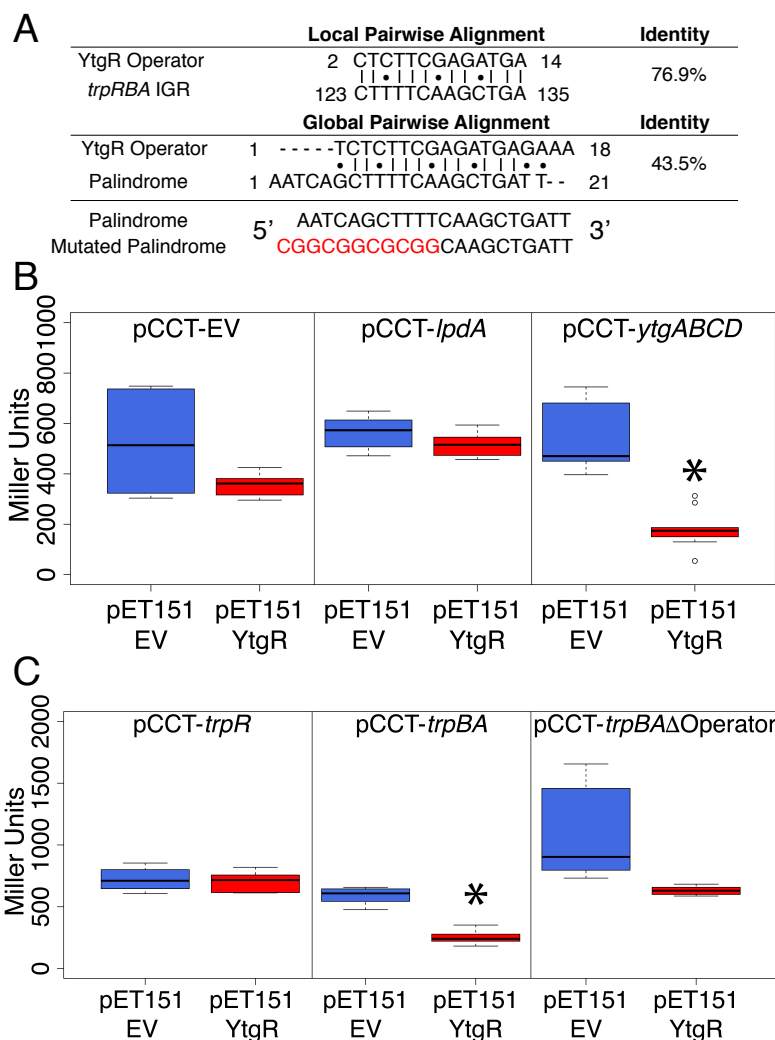

637 **Figure 5.** Ectopically expressed YtgR domain is capable of binding the putative *trpBA*  
 638 promoter element in an operator-specific manner to repress transcription in a  
 639 heterologous system. (A) Identification of putative YtgR operator sequence by local and  
 640 global nucleotide sequence alignment using EMBOSS Water and Needle algorithms,  
 641 respectively, to align the previously identified YtgR operator to both the *trpRBA* IGR and  
 642 palindromic candidate sequence. The palindrome was then mutated in our YtgR  
 643 repression assay as depicted to abolish palindromicity and AT-richness. (B) Ectopic  
 644 expression of YtgR significantly represses  $\beta$ -galactosidase activity only from the  
 645 promoter of its own operon, *ytgABCD*, and not from an empty vector or another iron-  
 646 regulated but presumably non-YtgR targeted promoter, *lpdA*. N = 2 or 3. (C) Expression  
 647 of recombinant YtgR represses  $\beta$ -galactosidase activity from the putative *trpBA*  
 648 promoter element, but not the *trpR* promoter, and this repression is dependent on the  
 649 unaltered operator sequence identified in Fig. 5A. N = 2 or 3. Statistical significance  
 650 determined by two-sided unpaired Student's *t*-test with Welch's correction for unequal  
 651 variance. \* =  $p < 0.05$ , \*\* =  $p < 0.01$ , \*\*\* =  $p < 0.005$ .

652 **Transcripts initiated at the primary *trpR* promoter terminate at the YtgR operator**  
653 **site.** We hypothesized that YtgR binding at the *trpRBA* YtgR operator site may  
654 disadvantage the processivity of RNAP reading-through the IGR from the upstream *trpR*  
655 promoter. Similar systems of RNAP read-through blockage have been reported; the  
656 transcription factor Reb1p “roadblocks” RNAPII transcription read-through in yeast by  
657 promoting RNAP pausing and subsequent degradation (Colin et al., 2014). To  
658 investigate this question, we first returned to RNA-Sequencing data we generated to  
659 define the immediate iron-dependent transcriptional regulon in *C. trachomatis*  
660 (Brinkworth et al., 2018). Using data obtained from *C. trachomatis*-infected HeLa cells at  
661 12 hpi + 6h mock or Bpdl treatment, we mapped the sequenced reads in batch across  
662 three biological replicates to the *C. trachomatis* L2 434/Bu genome (NC\_010287) which  
663 we modified to include annotations for non-operonic IGRs. This coverage map indicated  
664 that under Bpdl-treated conditions, a higher proportion of reads mapped to the *trpRBA*  
665 IGR (IGR\_trpB) relative to mock-treatment (Figure 6A). However, a notable increase in  
666 reads mapping to the upstream *trpR* CDS was not observed, suggesting that under iron  
667 replete conditions, transcripts originating from the primary *trpR* promoter may be  
668 terminated before reading through the IGR. Note that this is consistent with the original  
669 observation that *trpR* is not differentially expressed under iron-limited conditions in this  
670 RNA-Seq dataset (Brinkworth et al., 2018). We additionally investigated the abundance  
671 of reads mapping to the IGRs upstream of *euo* (IGR\_euo; not iron-regulated, not YtgR-  
672 regulated) and *lpdA* (IGR\_lpdA; iron-regulated, not YtgR-regulated), and were unable to  
673 observe a similar increase in read coverage at these IGRs following Bpdl treatment,  
674 indicating that the increased coverage at the *trpRBA* IGR was specific (Figure 6 –

675 Figure Supplement 1A-B). The absolute number of reads mapping to the *trpRBA* IGR  
676 under these conditions was very low relative to either upstream or downstream CDS,  
677 implying that the terminated transcript species are rare. We therefore turned to more  
678 sensitive and quantitative methods to interrogate possible transcript termination within  
679 the *trpRBA* IGR.

680 To identify transcription termination sites (TISs) in the *trpRBA* operon in *C.*  
681 *trachomatis*, we utilized 3'-RACE to map the 3'-ends of transcripts using gene-specific  
682 primers within the *trpR* CDS (Figure 6B; bottom). We again utilized two RACE  
683 amplification cycles to generate distinct, specific bands suitable for isolation and  
684 sequencing (Figure 6 – Figure Supplement 2B-C). By gel electrophoresis of the 3'-  
685 RACE products, we observed the appearance of four distinct bands that migrated with  
686 an apparent size of 0.55, 0.45, 0.40 and 0.20 kb. In our Trp-depleted condition, we  
687 observed only a very weak amplification of the 2.5 – 3 kb full-length *trpRBA* message by  
688 3'-RACE (Figure 6 – Figure Supplement 2A). However, we did observe it across all  
689 replicates. To confirm that the full-length product was specific to the Trp-deplete  
690 treatment, we amplified the *trpRBA* operon by RT-PCR from the 3'-RACE total RNA  
691 (Figure 6B; top). As expected, only in the Trp-deplete sample did we observe robust  
692 amplification of the full-length *trpRBA* message. We note however that image contrast  
693 adjustment reveals a very weak band present in all experimental samples. In  
694 accordance with the RNA-Sequencing data, 3'-RACE demonstrated the presence of  
695 unique transcription termination events in the *trpRBA* operon.

696 To identify the specific TTS locations, we gel extracted the four distinct 3'-RACE  
697 bands across all conditions and cloned them into the pRACE sequencing vector as was

698 done for the 5'-RACE experiments. We then sequenced the inserted RACE products  
699 and mapped them to the *C. trachomatis* L2 434/Bu genome (Figure 6B). This revealed a  
700 highly dynamic TTS landscape within the *trpRBA* IGR, which has not previously been  
701 investigated (For a full description of mapped 3'-RACE products, see Supplementary  
702 File 2). The 0.20 kb RACE product mapped to the 3'-end of the *trpR* CDS, with a mean  
703 nucleotide position of 511,665 and a modal nucleotide position of 511,667 (Figure 6 –  
704 Figure Supplement 3A). Contrastingly, the other three 3'-RACE products did not map in  
705 such a way so as to produce specific, unambiguous modal peaks. Instead, their  
706 distribution was broader and more even, with only a few nucleotide positions mapping  
707 more than once. Accordingly, the 0.45 kb product mapped with an average nucleotide  
708 position of 511,889, just downstream of the 1.1 kb 5'-RACE product (Figure 6 – Figure  
709 Supplement 3C), while the 0.55 kb product mapped with an average nucleotide position  
710 of 511,986, upstream of the 1.0 kb 5'-RACE product (Figure 6 – Figure Supplement  
711 3D). Interestingly, the 0.40 kb product mapped to a region directly overlapping the  
712 putative YtgR operator site, with a mean nucleotide position of 511,811 (Figure 6 –  
713 Figure Supplement 3B). We therefore reasoned that this putative TTS may have an  
714 iron-dependent function.

715

716

717

718

719

720

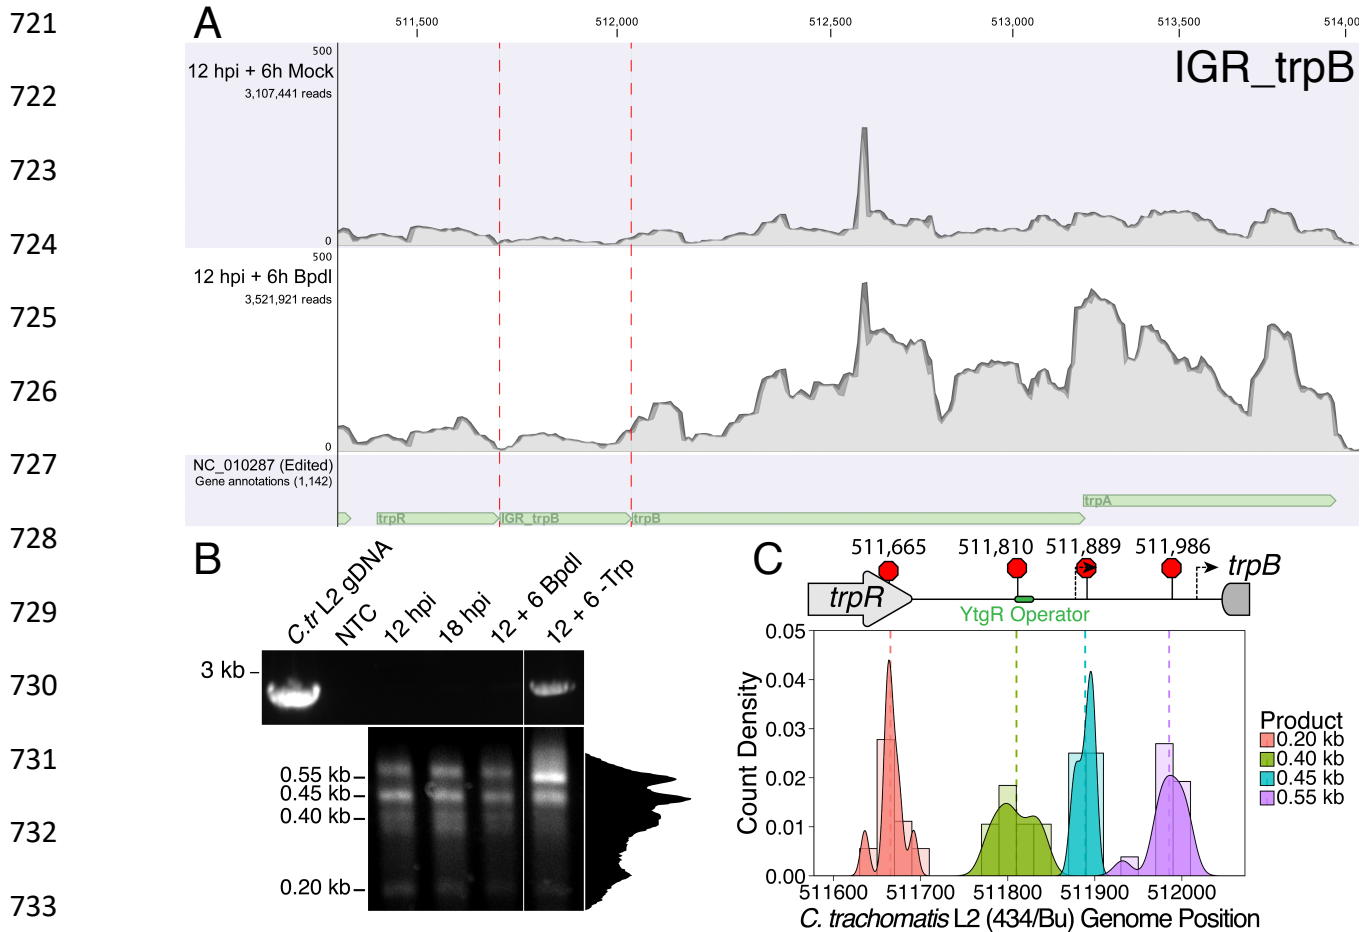

734  
735 **Figure 6.** Transcription from the primary *trpR* promoter terminates in the *trpRBA* IGR  
736 region, notably at the YtgR operator site. (A) Coverage map of RNA-Sequencing reads  
737 mapped to the *C. trachomatis* L2/434 Bu genome (NC\_010287) edited to contain  
738 annotations for non-operonic IGRs. Read coverage at the *trpRBA* IGR (IGR\_trpB) is  
739 increased following Bpdl treatment, but *trpR* read coverage is not similarly increased.  
740 (B) Total RNA was harvested from *C. trachomatis*-infected HeLa cells to analyze 3'-  
741 cDNA landscape downstream of the *trpR* promoter. The top panel displays  
742 representative RT-PCR of full-length *trpRBA* message across experimental conditions  
743 (NTC = No Template Control). Bottom panel depicts electrophoresed 3'-RACE products  
744 and estimated sizes. Intensity plot to the right of image was generated using the Fiji  
745 Dynamic ROI Profiler plugin to monitor intensity across the 18 hpi condition. Note the  
746 presence of four distinct peaks, corresponding to each 3'-RACE product. N=3. (C) 3'-  
747 RACE products were sequenced and mapped to *C. trachomatis* L2 434/Bu genome by  
748 nucleotide BLAST. Figure displays histogram (semi-continuous; bin width=20) and  
749 overlaid density plot (continuous) distribution of 3' nucleotide positions generated from  
750 each 3'-RACE product. The dotted line represents the weighted mean of the  
751 distribution, as indicated by the integer value above each line. The identified alt. TTSS  
752 are depicted on the *trpRBA* operon (drawn to scale) above the plot. The 0.40 kb RACE  
753 product mapped to a region overlapping the predicted YtgR operator site. N=3.

754 **Iron limitation promotes transcription read-through at the YtgR operator site.**

755 Given the observation that transcripts terminated at the YtgR operator site, we  
756 hypothesized that YtgR binding may promote transcription termination at this locus.  
757 Conversely, we hypothesized that inactivating YtgR DNA-binding by Bpdl treatment  
758 would allow transcription to read through the YtgR operator site. To quantitatively  
759 analyze the possibility that iron-depletion, and thus dissociation of YtgR, may facilitate  
760 transcription read-through at the operator site, we utilized RT-qPCR to monitor the  
761 abundance of various amplicons across the *trpRBA* operon (Figure 7A). We quantified  
762 these data in relation to a “read-through” normalization amplicon that, based on 5'- and  
763 3'-RACE data, should only be represented when the full-length *trpRBA* message is  
764 transcribed (Figure 7A). The representation of a specific mRNA species relative to the  
765 full-length transcript should therefore be interpretable through a simple ratio of the  
766 experimental amplicon to the “read-through” amplicon. If an mRNA species is poorly  
767 represented relative to the full-length transcript, the ratio should be approximately 1.0.  
768 Conversely, if that species is over-represented relative to the full-length transcript, the  
769 ratio should exceed 1.0 (Figure 7B; left). Therefore, as each amplicon is increasingly  
770 represented as a part of the full-length transcript, the ratio of the specific amplicon to the  
771 normalization amplicon should approach 1.0 (Figure 7B; right).

772 We first analyzed an amplicon from nucleotide 511,416 – 531 to monitor the  
773 relative abundance of transcript species associated with transcription initiating at the  
774 *trpR* promoter (Figure 7C). We observed that the representation of this amplicon was  
775 not significantly altered following iron limitation relative to 12 hpi, suggesting that the  
776 depletion of iron was not affecting initiation of transcription at the *trpR* promoter.



777 Interestingly, at 18 hpi, the representation ratio of this amplicon significantly shifted  
778 further away from 1.0 ( $p = 0.00358$ ), indicating that at 18 hpi this amplicon is  
779 represented less as a component of read-through transcription relative to 12 hpi. As  
780 expected, under Trp-deplete conditions, the representation ratio shifted significantly  
781 closer to 1.0 ( $p = 0.00064$ ), consistent with read-through transcription of the full-length  
782 *trpRBA* message.

783 We then performed the same analysis on an amplicon from nucleotide 511,639 –  
784 764, immediately upstream of the TTS at the YtgR operator site to monitor condition-  
785 dependent read-through at this site (Figure 7D). We again observed that at 18 hpi, the  
786 representation ratio was significantly increased ( $p = 0.01046$ ), and following Trp-  
787 depletion, the ratio was significantly decreased ( $p = 0.00023$ ), as expected. Notably,  
788 and consistent with our hypothesis, we observed that the representation ratio of this  
789 amplicon was also significantly closer to 1.0 following iron limitation ( $p = 0.00407$ ),  
790 suggesting that transcription read-through was increased at this site under iron limited  
791 conditions. Indeed, if YtgR is dissociating from the operator site during iron depletion, a  
792 greater proportion of transcripts would be expected to read-through this locus.

793 Finally, we analyzed an amplicon from nucleotide 513,856 – 968, at the very 3’-  
794 end of *trpA* to assess changes in terminal transcription under our experimental conditions  
795 (Figure 7E). At 18 hpi, we observed a significant increase in the representation ratio of  
796 this amplicon ( $p = 0.00476$ ), which is likely attributable to both basal levels of alternative  
797 transcription from the IGR as well as poor transcription read-through of the full-length  
798 message. Following 6 hrs of Bpdl treatment, we also observed a significant increase in  
799 the representation ratio of this amplicon ( $p = 0.01510$ ), which supports the finding that

800 *trpBA* is being preferentially transcribed under this condition, distinct from the full-length  
801 *trpRBA* transcript. We were only able to detect a marginal decrease in the  
802 representation of this amplicon under Trp-depleted conditions ( $p = 0.07942$ ), which may  
803 suggest that the very 3'-end of *trpRBA* is under-represented relative to our  
804 normalization amplicon, which falls within the middle of the operon. In fact, recent work  
805 has reported on the relatively poor representation of 3'-end mRNAs in *Chlamydia*  
806 (Ouellette, Rueden, & Rucks, 2016). In sum, this set of experiments provides evidence  
807 that iron-depletion specifically alters the representation of particular mRNA species  
808 across the *trpRBA* operon. Additionally, they implicate iron-dependent YtgR DNA-  
809 binding as the mediator of these effects. By alleviating YtgR repression via iron  
810 depletion, transcription is allowed to proceed through the operator site, albeit at basal  
811 levels. Concomitantly, transcription is specifically activated at the downstream alt. TSS  
812 for *trpBA*.

813

814

815

816

817

818

819

820

821

822

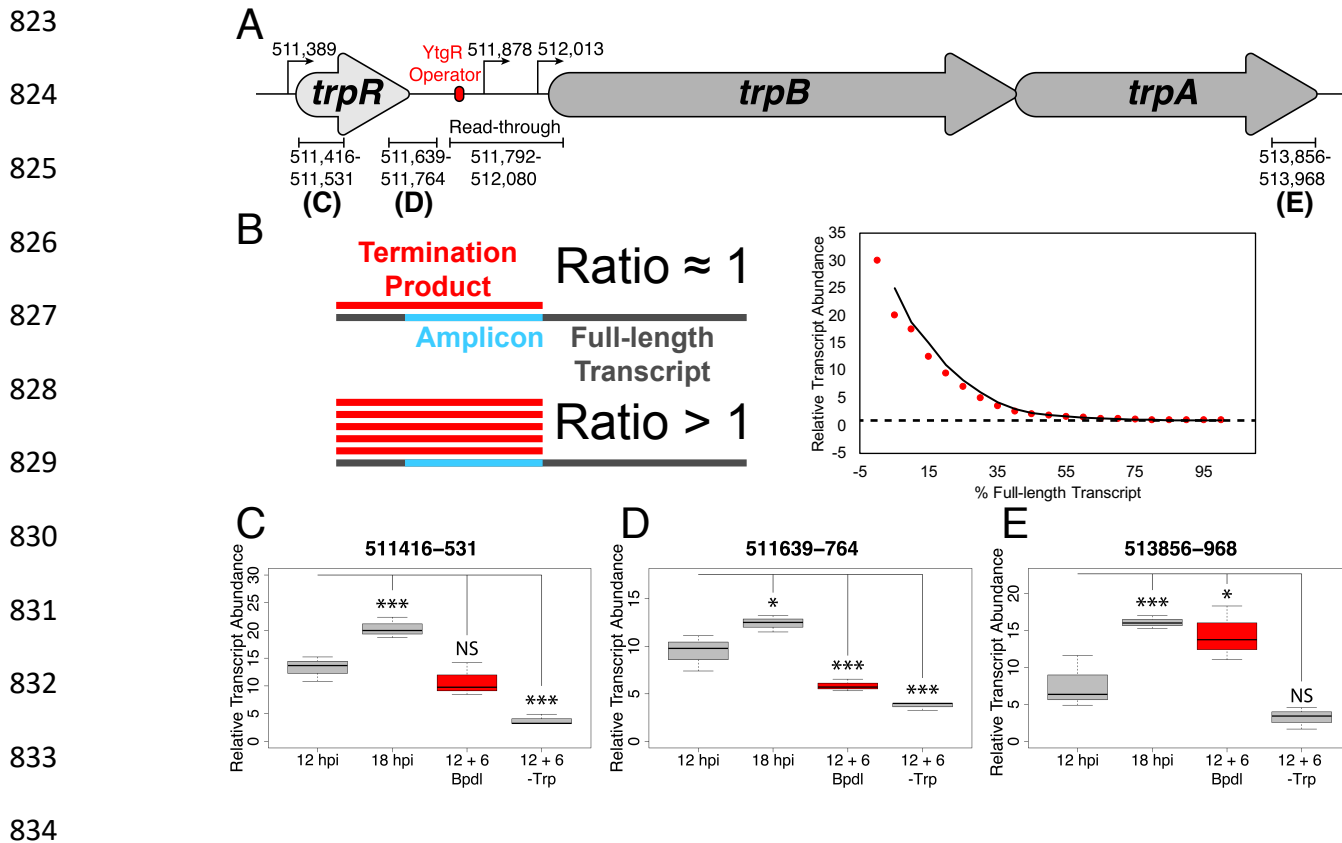

835  
 836 **Figure 7.** Iron limitation promotes transcription read-through at the YtgR operator site.  
 837 (A) Cartoon depiction of amplicons analyzed in these experiments across the *trpRBA*  
 838 operon, with the identified TSSs and YtgR operator site annotated. Drawn to scale. (B)  
 839 Schematic representation of RT-qPCR analysis. On the left, a biological interpretation of  
 840 the ratio used to determine the relative transcript abundance is provided. When a  
 841 termination product (red) is poorly represented, e.g. read-through is high, the ratio of  
 842 specific amplicon (blue) to full-length transcript (grey) should be close to 1.0. When the  
 843 termination product is abundant, e.g. read-through is low, then the ratio should exceed  
 844 1.0. On the right, a graphical demonstration of this concept is provided using mock data.  
 845 The dotted line represents the theoretical asymptote at a value of 1.0. (C) Analysis of  
 846 transcription read-through by RT-qPCR was performed on 3'-RACE total RNA at three  
 847 distinct loci across the *trpRBA* operon representing upstream transcription initiation  
 848 (511,416-531), (D) YtgR operator site termination (511,639-764) and (E) terminal *trpBA*  
 849 transcription (513,856-968). Abundance of each amplicon was normalized to a region  
 850 (Read-through) predicted to be transcribed only as a part of the full-length product  
 851 based on 5' and 3'-RACE data (511,792-512,080). Thus, the ratio of each amplicon to  
 852 the normalization amplicon represents the proportion of that amplicon encoded as part  
 853 of the full-length transcript. At the YtgR operator termination site, iron limitation reduces  
 854 the ratio relative to 12 hpi, suggesting that transcription read-through increases at this  
 855 site under this condition. Statistical significance determined by One-way ANOVA  
 856 followed by post-hoc pairwise *t*-tests. \* =  $p < 0.05$ , \*\* =  $p < 0.01$ , \*\*\* =  $p < 0.005$ .

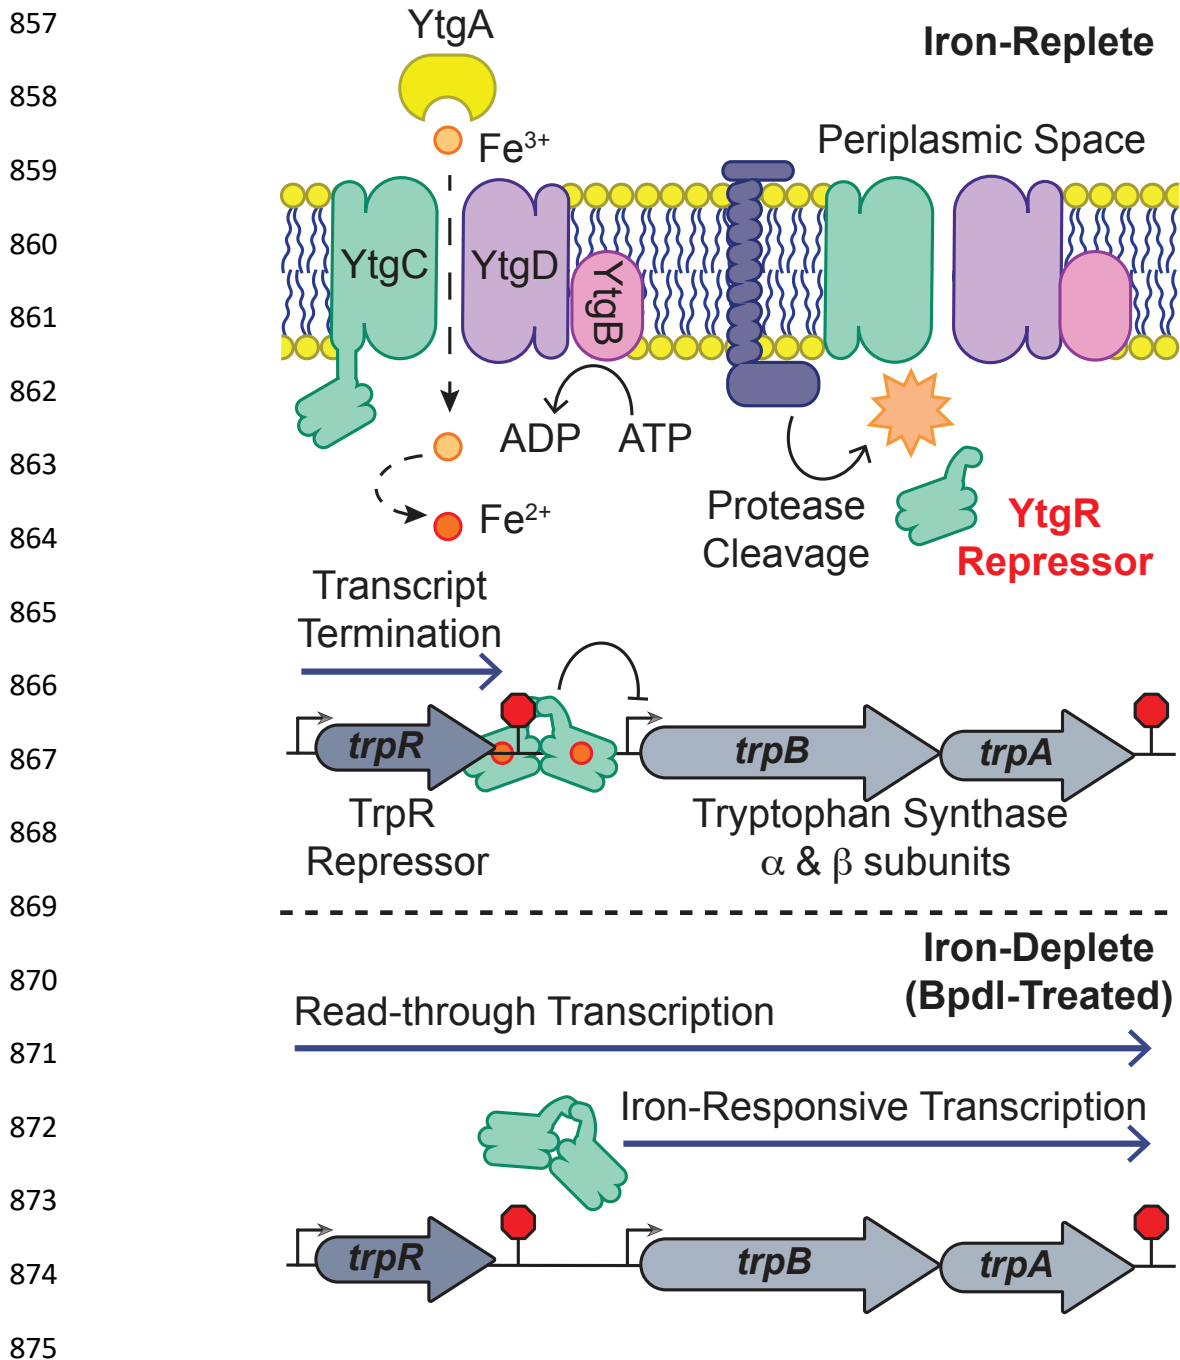

876 **Figure 8.** Model for proposed mechanism of iron-dependent YtgR-mediated regulation  
 877 of *trpRBA* expression. Iron is imported through the YtgABCD ABC-type metal permease  
 878 complex. YtgR is cleaved from the YtgCR permease-repressor fusion protein. In the  
 879 presence of sufficient iron, holo-YtgR can bind to the *trpRBA* IGR to both terminate  
 880 basal transcription from the primary *trpR* promoter and repress transcription initiation at  
 881 the alternative *trpBA* promoter. Iron depletion inactivates YtgR DNA-binding, thus  
 882 promoting read-through of basal transcription from the *trpR* promoter while also  
 883 inducing transcription at the downstream *trpBA* promoter.

## 884 Discussion

885 In this study, we provide a mechanistic explanation for the specific iron-limited  
886 induction of *trpBA* expression mediated by the repressor YtgR, representing a novel  
887 instance of integrated stress adaptation in *Chlamydia*. Utilizing an infected-epithelial cell  
888 culture model, we identified a previously undescribed iron-regulated promoter element  
889 within the *trpRBA* IGR responsible for the iron-limited induction of *trpBA* expression  
890 independent of *trpR*. Using *in silico*, biochemical and chemical-genetic methods, we  
891 demonstrate that YtgR binds the *trpRBA* IGR to regulate iron-dependent *trpBA*  
892 expression. Importantly, transcriptional repression in our heterologous system was  
893 shown to be dependent on an unaltered operator sequence that bears significant  
894 homology to the previously defined operator element in the *ytg* promoter. Previously  
895 published reports have demonstrated that YtgR is capable of directly binding DNA  
896 sequences containing this operator *in vitro* (Akers et al., 2011; Thompson et al., 2012).  
897 Furthermore, our infected-cell culture studies revealed that transcripts originating from  
898 the primary *trpR* promoter terminate within the IGR, notably at the putative YtgR  
899 operator site, and that transcription read-through at this locus is iron-dependent. Thus,  
900 we propose that YtgR regulates *trpBA* expression at two levels: repression of the *trpBA*  
901 promoter and premature termination of the major transcript generated from the *trpR*  
902 promoter (Figure 8). This is the first time an iron-dependent mode of regulation has  
903 been shown to control the expression of tryptophan biosynthesis in prokaryotes, which  
904 reflects the uniquely specialized nature of *C. trachomatis*.

905 While we demonstrate here that iron-dependent *trpBA* expression originates from  
906 a novel promoter element immediately upstream of the *trpB* CDS, this is not the first

907 description of an alt. TSS within the *trpRBA* IGR. Carlson, *et al.* identified an alt. TSS  
908 within the IGR which they suggested was responsible for *trpBA* expression (Carlson et  
909 al., 2006). In these studies, we were unable to confirm the presence of the previously  
910 identified alt. TSS by 5'-RACE. This is likely because Carlson, *et al.* examined the  
911 presence of transcript origins following 24 hrs of Trp starvation whereas here we  
912 monitored immediate responses to stress following only 6 hrs of treatment. Prolonged  
913 Trp depletion would result in a more homogeneously stressed population of chlamydial  
914 organisms that may exhibit the same preferential utilization of the promoter identified by  
915 Carlson, *et al.*, the detection of which is precluded in a more heterogeneous, transiently-  
916 stressed population. This may explain the observation of multiple T(S/T)Ss across the  
917 *trpRBA* operon in our studies. However, the contribution of such a Trp-dependent alt.  
918 TSS as identified by Carlson *et al.* to the general stress response of *C. trachomatis*  
919 remains unclear given its association with presumably abnormal organisms. Does  
920 utilization of this alt. TSS indicate abnormal growth or a *bona fide* stress adaptation?  
921 Moreover, Akers & Tan were unable to verify TrpR binding to the *trpRBA* IGR by EMSA,  
922 suggesting that some other Trp-dependent mechanism may control transcription from  
923 this site (Akers & Tan, 2006). Ultimately, our approach of investigating more immediate  
924 responses to stress revealed previously unreported mechanisms functioning to regulate  
925 Trp biosynthesis in *C. trachomatis*, underscoring the value of transient as opposed to  
926 sustained induction of stress.

927 Another mechanism of regulation reported to control the chlamydial *trpRBA*  
928 operon is Trp-dependent transcription attenuation. Based on sequence analysis, a  
929 leader peptide has been annotated within the *trpRBA* IGR (Merino & Yanofsky, 2005).

930 Presumably, this functions analogously to the attenuator in the *E. coli trpEDCBA*  
931 operon; Trp starvation causes ribosome stalling at sites of enriched Trp codons such  
932 that specific RNA secondary structures form to facilitate RNAP read-thru of downstream  
933 sequences – in this case, *trpBA* (Yanofsky, 1981). However, robust experimental  
934 evidence to support the existence of attenuation in *C. trachomatis* is lacking. To date,  
935 the only experimental evidence that supports this model was reported by Carlson, *et al.*,  
936 who demonstrated that in a TrpR-mutant genetic background, an additional increase in  
937 *trpBA* expression could be observed following 24 hr Trp-depletion. (Carlson *et al.*,  
938 2006). However, this could be attributable to an alternative Trp-dependent, *but TrpR-*  
939 *independent* mechanism controlling *trpBA* expression at the alt. TSS identified by  
940 Carlson, *et al.* None of the data presented here point conclusively to the existence of a  
941 Trp-dependent attenuator. The additional termination sites identified in our 3'-RACE  
942 assay may represent termination events mediated by an attenuator, but without more  
943 specific analysis utilizing mutated sequences we cannot attribute attenuator function to  
944 those termination sites.

945 Interestingly, in *Bacillus subtilis*, Trp-dependent attenuation of transcription takes  
946 on a form markedly different from that in *E. coli*. Whereas attenuation functions in *cis* for  
947 the *E. coli trp* operon, *B. subtilis* utilize a multimeric Tryptophan-activated RNA-binding  
948 Attenuation Protein, TRAP, which functions in *trans* to bind *trp* operon RNA under Trp-  
949 replete conditions, promoting transcription termination and inhibiting translation  
950 (Gollnick, Babitzke, Antson, & Yanofsky, 2005). This interaction is antagonized by anti-  
951 TRAP in the absence of charged tRNA<sup>Trp</sup>, leading to increased expression of TRAP  
952 regulated genes. We suggest that YtgR may represent the first instance of a separate

953 and distinct clade of attenuation mechanisms: iron-dependent *trans*-attenuation. This  
954 mechanism may function independently of specific RNA secondary structure, relying  
955 instead on steric blockage of RNAP processivity, but ultimately producing a similar  
956 result. Possible regulation of translation remains to be explored. The recent  
957 development of new genetic tools to alter chromosomal sequences and generate  
958 conditional knockouts in *C. trachomatis* should enable a more detailed analysis of  
959 *trpRBA* regulation, including possible *trans*-attenuation (Mueller, Wolf, & Fields, 2016;  
960 Ouellette, 2018).

961         As a Trp auxotroph, what might be the biological significance of iron-dependent  
962 YtgR regulation of the *trpRBA* operon in *C. trachomatis*? We have already noted the  
963 possibility that iron-dependent *trpBA* regulation in *C. trachomatis* may enable the  
964 induction of a similar response to both Trp and iron starvation, stimuli likely mediated by  
965 IFN- $\gamma$  *in vivo*. This mechanism also presents the opportunity for *C. trachomatis* to  
966 respond similarly to distinct *sequential* stresses, where a particular stress may prime the  
967 pathogen to better cope with subsequent stresses. To reach the female upper genital  
968 tract (UGT), where most significant pathology is identified following infection with *C.*  
969 *trachomatis*, the pathogen must first navigate the lower genital tract (LGT). *Chlamydia*  
970 infections of the female LGT are associated with bacterial vaginosis (BV), which is  
971 characterized by obligate and facultative anaerobe colonization, some of which produce  
972 indole (Sasaki-Imamura, Yoshida, Suwabe, Yoshimura, & Kato, 2011; Ziklo, Huston,  
973 Hocking, & Timms, 2016). This provides *C. trachomatis* with the necessary substrate to  
974 salvage tryptophan via TrpBA. Interestingly, the LGT is also likely an iron-limited  
975 environment. Pathogen colonization and BV both increase the concentration of mucosal



976 lactoferrin (Lf), an iron-binding glycoprotein, which can starve pathogens for iron (Spear  
977 et al., 2011; Valenti et al., 2018). Lf expression is additionally hormone-regulated, and  
978 thus the LGT may normally experience periods of iron limitation (Cohen, Britigan,  
979 French, & Bean, 1987; Kelder et al., 1996). Moreover, the expression of TfR is  
980 constrained to the basal cells of the LGT stratified squamous epithelium (Lloyd,  
981 O'Dowd, Driver, & Tee, 1984), which likely restricts necessary Tf-bound iron from *C.*  
982 *trachomatis* infecting the accessible upper layers of the stratified epithelia (Nogueira,  
983 Braun, & Carabeo, 2017; Ouellette & Carabeo, 2010).

984         For *C. trachomatis*, iron limitation may therefore serve as a critical signal in the  
985 LGT, inducing the expression of *trpBA* such that Trp is stockpiled from available indole,  
986 allowing the pathogen to counteract impending IFN- $\gamma$ -mediated Trp starvation. We  
987 suggest the possibility that iron limitation in the LGT may be a significant predictor of  
988 successful pathogen colonization in the UGT. Unfortunately, testing these hypotheses in  
989 cell culture models of infection presents a significant challenge. Evaluating rescue of  
990 chlamydial growth in the presence of indole to specifically assess the iron-dependent  
991 role of *trpBA* requires simultaneous Trp and iron depletion. The former ensures indole  
992 utilization by the bacteria, and the latter de-represses YtgR-regulated *trpBA* expression.  
993 In theory, this is feasible, but in practice the combined stress rapidly induces aberrant  
994 development, muddying results obtained from such studies (data not shown). Ideally,  
995 genetic approaches could be employed to distinguish the regulatory effects of YtgR  
996 independent of TrpR. However, the genetic manipulation of *trans*-acting factors (e.g.  
997 YtgR) will presumably have unpredictable off-target effects. Genetically altering *cis*-  
998 acting factors – such as operator sequences – is more feasible, but at present we lack

999 the information necessary to rationally mutate these sequences in *C. trachomatis* to  
1000 interrogate these questions. The tight regulatory coordination at both the transcription  
1001 initiation and termination steps would likely mean any mutation in the *cis*-acting  
1002 sequences would affect both processes indiscriminately. Furthermore, *in vivo* infection  
1003 models present challenges: attempting to answer these questions will likely require the  
1004 use of *in vivo* non-human primate studies, as mouse models of *Chlamydia*-infection do  
1005 not recapitulate immune-mediated Trp starvation (Nelson et al., 2005). Ultimately, these  
1006 limitations do not undermine the biological significance of an iron-dependent mode of  
1007 regulating Trp salvage, given the critical role played by this pathway during infection.

1008 Finally, and of note, the expression of the ribonucleotide diphosphate-reductase-  
1009 encoding *nrdAB* was also recently shown to be iron-regulated in *C. trachomatis*  
1010 (Brinkworth et al., 2018). The regulation of *nrdAB* is known to be mediated by the  
1011 presumably deoxyribonucleotide-dependent transcriptional repressor NrdR, encoded  
1012 distal to the *nrdAB* locus (Case, Akers, & Tan, 2011). As NrdR activity is not known to  
1013 be modulated by iron availability, this raises the intriguing possibility that here too a  
1014 unique iron-dependent mechanism of regulation may integrate the chlamydial stress  
1015 response to promote a unified response across various stress conditions. Future studies  
1016 may require more metabolomics-based approaches to thoroughly dissect the integration  
1017 of these stress responses, as transcriptome analyses alone often miss broader,  
1018 pathway-oriented metabolic coordination. Ultimately, these studies point towards a need  
1019 to carefully re-evaluate the molecular stress response in *Chlamydia*, with greater  
1020 emphasis on the use of targeted approaches and treatment protocols that induce stress,  
1021 but not persistence. We anticipate that the rapid progress of the field in recent years will

1022 continue to catalyze exciting and important discoveries regarding the fundamental  
1023 biology of *Chlamydia*.

## 1024 **Materials and Methods**

### 1025 **Eukaryotic Cell Culture and Chlamydial Infections**

1026 Human cervical epithelial adenocarcinoma HeLa (ATCC® CCL-2) cells were cultured at  
1027 37° C with 5% atmospheric CO<sub>2</sub> in Dulbecco's Modified Eagle Medium (DMEM)  
1028 supplemented with 10 µg/mL gentamicin, 2 mM L-glutamine, and 10% (v/v) filter  
1029 sterilized fetal bovine serum (FBS). For all experiments, HeLa cells were cultured  
1030 between passage numbers 4 and 16. *Chlamydia trachomatis* serovar L2 (434/Bu) was  
1031 originally obtained from Dr. Ted Hackstadt (Rocky Mountain National Laboratory,  
1032 NIAID). Chlamydial EBs were isolated from infected HeLa cells at 36-40 hours post-  
1033 infection (hpi) and purified by density gradient centrifugation essentially as described  
1034 (Caldwell, Kromhout, & Schachter, 1981).

1035  
1036 For the infection of 6-well tissue culture plates, HeLa cells cultured to 80-90%  
1037 confluency were first washed with pre-warmed Hanks Buffered Saline Solution (HBSS)  
1038 prior to the monolayer being overlaid with inoculum (un-supplemented DMEM) at the  
1039 indicated multiplicity of infection (MOI). Tissue culture plates were then centrifuged at 4°  
1040 C with a speed of 1000 RPM (Eppendorf 5810 R table top centrifuge, A-4-81 rotor) for 5  
1041 minutes to synchronize the infection. Inoculum was aspirated and cells were washed  
1042 again with pre-warmed HBSS prior to the media being replaced with pre-warmed  
1043 complete DMEM. Infected cultures were then returned to the tissue culture incubator  
1044 until the indicated times post-infection. This procedure was replicated exactly for the  
1045 infection of 24-well tissue culture plates.

### 1046 1047 **Iron Starvation**

1048 *Chlamydia trachomatis* L2-infected HeLa cell cultures were starved for iron by  
1049 supplementation of the media with the iron chelator 2,2-bipyridyl (Bpdl; Sigma Aldrich,  
1050 St. Louis, MO, USA; CAS: 366-18-7) essentially as described (Thompson & Carabeo,  
1051 2011). Briefly, at the indicated times post-infection, infected cell cultures were washed  
1052 with pre-warmed HBSS prior to the addition of complete DMEM (mock) or complete  
1053 DMEM supplemented with 100 µM Bpdl. Infected cell cultures were returned to the  
1054 incubator for the indicated treatment periods. Bpdl was prepared as a 100 mM stock  
1055 solution in 100% ethanol and stored at -20° C for no longer than 6 months.

### 1056 1057 **Tryptophan Starvation**

1058 *Chlamydia trachomatis* L2-infected HeLa cell cultures were starved for tryptophan by  
1059 replacement of complete DMEM with tryptophan-depleted medium. In brief, Tryptophan-  
1060 replete or -deplete DMEM-F12 (U.S. Biological Life Sciences, Salem, MA, USA)  
1061 powder media was prepared following manufacture instructions and supplemented with  
1062 10% (v/v) filter-sterilized FBS which had been previously dialyzed 16-20h at 4° C in PBS  
1063 in a 10 kDa MWCO dialysis cassette. Media was then further supplemented with 10  
1064 µg/mL gentamicin. At the indicated times post-infection, complete DMEM was aspirated

1065 and wells were washed with pre-warmed HBSS prior to the addition of tryptophan-  
1066 replete or –deplete medium. Infected cell cultures were returned to the incubator for the  
1067 indicated treatment periods.

1068

### 1069 **Cloning**

1070 All constructs were cloned using standard molecular cloning techniques, e.g. restriction  
1071 enzyme, homology-directed, etc. All primers and plasmids used in this study can be  
1072 found in Supplementary file 3 and 4, respectively.

1073

### 1074 **Immunofluorescent Confocal Microscopy**

1075 At the indicated times post-infection, *C. trachomatis* L2-infected HeLa cell cultures  
1076 seeded on glass coverslips in 24-well tissue cultures plates were first washed with pre-  
1077 warmed HBSS prior to fixation with 4% paraformaldehyde (PFA) in phosphate buffered  
1078 saline (PBS) for 20 minutes at RT ° C. Fixation solution was aspirated and wells were  
1079 washed with PBS prior to permeabilization with 0.2% Triton X-100 in PBS for 5 minutes  
1080 at RT° C. Permeabilization solution was then decanted and cells were washed with  
1081 PBS. The coverslips were blocked for 30 minutes with 1% bovine serum albumin (BSA)  
1082 in PBS at RT° C. To stain for *Chlamydia*, coverslips were washed with PBS and PBS  
1083 supplemented with 1% BSA and 1:500 convalescent human sera was added to wells  
1084 and incubated at RT° C for 1 hour with rocking. Primary antibody solution was decanted  
1085 and coverslips were again washed with PBS. Goat anti-human Alexa-647 (Invitrogen,  
1086 ThermoFisher Scientific, Waltham, MA, USA) diluted 1:1000 in PBS with 1% BSA was  
1087 then added to the wells and incubated in the dark for another hour at RT° C with  
1088 rocking. Secondary antibody solution was then decanted, coverslips were washed again  
1089 with PBS and coverslips were either immediately mounted on microscopy slides using  
1090 ImmuMount (ThermoFisher Scientific) or VectaShield H-1000 (Vector Laboratories,  
1091 Burlingame, CA, USA) or stored in the dark at 4° C until mounting. All images were  
1092 acquired on a Leica TCS SP8 laser scanning confocal microscope, using identical  
1093 settings, in the Integrative Physiology and Neuroscience Advanced Imaging Center at  
1094 Washington State University. All images are Z-projections and were processed in Fiji  
1095 (Schindelin et al., 2012) and Adobe Creative Suite identically for each comparative time-  
1096 point.

1097

### 1098 **Nucleic Acid Preparation**

1099 RNA was harvested from *C. trachomatis*-infected HeLa cell monolayers by scraping 3  
1100 wells of a 6-well plate in ice-cold Trizol® Reagent (ThermoFisher Scientific). Samples  
1101 were then pooled and split into two technical replicates (RT-qPCR) or kept as one  
1102 biological replicate (RACE). Trizol®-extracted samples were then thoroughly vortexed  
1103 with a 100 µL volume of Zirconia beads prior to chloroform extraction. 100% ethanol  
1104 was added to the aqueous phase and RNA was isolated using the Ambion®  
1105 RiboPure™ RNA Purification kit for bacteria following manufacturer instructions  
1106 (ThermoFisher Scientific). DNA was removed from RNA samples using the Invitrogen  
1107 DNA-free™ DNA Removal Kit following manufacturer instructions (ThermoFisher  
1108 Scientific). RNA was stored at -20° C until further use.

1109

1110 cDNA was generated using either SuperScript® IV Reverse Transcriptase (RT-qPCR;  
1111 ThermoFisher Scientific) or SMARTScribe™ Reverse Transcriptase (RACE and RACE-  
1112 specific qRT-PCR); Takara Bio, Kusatsu, Shiga Prefecture, Japan) essentially as  
1113 described by the respective manufacturers. For cDNA generated for RT-qPCR, 650 ng  
1114 of total RNA was used as a template in a 20 µL total reaction volume. For every RT  
1115 reaction, a “no-RT” control, generated from 350 ng of total RNA template in a 10 µL total  
1116 volume, was included. For 5'-RACE, cDNA was generated from 250 ng of total RNA  
1117 using random primers in a 10 µL total volume and further processed in the RACE  
1118 workflow. cDNA was stored at -20° C.

1119  
1120 gDNA was harvested from *C. trachomatis*-infected HeLa cell monolayers by scraping 3  
1121 wells of a 6-well plate in ice-cold PBS + 10% Proteinase K (ThermoFisher Scientific).  
1122 Samples were then pooled and split into two technical replicates for analysis of genome  
1123 copy number by qPCR. gDNA was isolated using the DNeasy Blood and Tissue Kit  
1124 following manufacturer protocols (QIAGEN, Hilden, Germany). gDNA was stored at -20°  
1125 C until further use.

1126  
1127 **Reverse Transcription Quantitative Polymerase Chain Reaction (RT-qPCR)**  
1128 cDNA (or gDNA in qPCR), prepared as described above, was diluted 1:10 or 1:100 in  
1129 nuclease-free H<sub>2</sub>O depending on the experimental condition being assayed (e.g.  
1130 treatment, point in development cycle, etc.). On ice, 3.3 µL of diluted sample was added  
1131 to 79 µL of PowerUp™ SYBR® Green Master Mix (ThermoFisher Scientific) with  
1132 specific qPCR primers diluted to 500 nM. From this master mix, each experimental  
1133 sample was assayed in triplicate 25 µL reactions. Assays were run on an Applied  
1134 Biosystems 7300 Real Time PCR System with cycling conditions as follows: Stage 1:  
1135 50.0° C for 2 min, 1 rep. Stage 2: 95.0° C for 10 min, 1 rep. Stage 3: 95.0° C for 15 sec,  
1136 40 reps. Stage 4: 60.0° C for 1 min, 1 rep. Primers were subjected to dissociation curve  
1137 analysis to ensure that a single product was generated. For each primer set, a standard  
1138 curve was generated using purified *C. trachomatis* L2 gDNA from EB preparations  
1139 diluted from 2 x 10<sup>-3</sup> to 2 x 10<sup>0</sup> ng per reaction. Ct values generated from each  
1140 experimental reaction were then fit to standard curves (satisfying an efficiency of  
1141 95±5%) for the respective primer pair and from the calculated ng quantities, transcript or  
1142 genome copy number was calculated as follows:

1143  
1144 
$$\text{Genome copy number} \left( \frac{\text{genome copies}}{\text{ng total gDNA}} \right) = \frac{\text{ng genome} \times df}{\text{ng total gDNA}} \times \frac{892,000 \text{ copies}}{\text{ng DNA}}$$

1145  
1146 
$$\text{Transcript copy number} \left( \frac{\text{transcript copies}}{\text{ng total gDNA}} \right) = \frac{\text{ng transcript} \times df}{\frac{\text{genome copies}}{\text{ng total gDNA}}} \times \frac{892,000 \text{ copies}}{\text{ng DNA}}$$

1147  
1148 Where *df* = dilution factor and the number of copies/ng DNA is calculated based on the  
1149 size of the *C. trachomatis* L2 genome assuming that the molar mass per base pair is  
1150 650 (g/mol)/bp (note that this value should be the same for any single-copy ORF on the  
1151 genome). All quantifications of genome copy number were determined using the *ahpC*

1152 qPCR primer set. Values from replicate assays were averaged, and values from  
1153 replicate RNA/gDNA isolations were averaged to obtain the mean and standard  
1154 deviation for one biological replicate. For some experiments, to account for batch effects  
1155 across biological replicates, data was transformed such that the mean of all samples in  
1156 each replicate was identical. In some instances, batch correcting generated negative  
1157 values, and in this case data sets were scaled such that the lowest value equaled 1.0.  
1158 HeLa cells were infected at an MOI of 2 for all RT-qPCR studies.

1159

### 1160 **5' Rapid Amplification of cDNA Ends (5'-RACE)**

1161 All RACE studies were performed using the SMARTer® RACE 5'/3' Kit (Takara Bio). To  
1162 observe 5'-RACE products from the *trpRBA* operon, a “nested” RACE protocol was  
1163 used as outlined in the SMARTer® RACE 5'/3' Kit user manual. Briefly, 1.25-2.5  $\mu$ L of  
1164 cDNA generated for RACE was added to a 25  $\mu$ L reaction volume and run in a thermal  
1165 cyclor for 40 cycles using the touch-down PCR conditions described by the  
1166 manufacturer. In brief, 5 cycles were run at an annealing temperature of both 72° C and  
1167 70° C prior to 30 cycles run with an annealing temperature of 68° C. Following this  
1168 primary amplification, the RACE products were diluted 1:50 in Tricine-EDTA Buffer  
1169 supplied by the manufacturer, and 2.5  $\mu$ L of diluted primary RACE product was added  
1170 to a 25  $\mu$ L reaction volume and subjected to another 20 cycles of nested PCR, as  
1171 described by the manufacturer, using primers designed within the amplicon of the  
1172 primary RACE products. Samples were electrophoresed on a 2% agarose gel for  
1173 visualization and analysis. HeLa cells were infected at a MOI of 5 for all RACE studies.

1174

### 1175 **3' Rapid Amplification of cDNA Ends (3'-RACE)**

1176 3'-RACE studies were performed essentially identical to 5'-RACE with the exception  
1177 that total RNA was subjected to poly(A) tailing with a Poly(A) Polymerase following  
1178 manufacturer instructions (New England Biolabs, Ipswich, MA, USA). In brief, at least  
1179 3.5  $\mu$ g of total RNA was incubated at 37° C with Poly(A) Polymerase in reaction buffer  
1180 supplemented with ATP and murine RNase Inhibitor (New England Biolabs) for 30  
1181 minutes prior to heat-inactivation at 65° C for 20 minutes. RNA was re-isolated through  
1182 an RNA clean-up filter cartridge (Ambion, ThermoFisher Scientific). A total of 125 ng of  
1183 poly(A)-tailed total RNA was then used to generate 3'-RACE ready cDNA in a 10  $\mu$ L  
1184 reaction volume following manufacturer instructions. Primary and nested RACE was  
1185 performed using 3'-RACE gene-specific primers following the same protocol for  
1186 amplification described for 5'-RACE, with the exception that the extension time was  
1187 adjusted to accommodate amplification of the full ~3 kb *trpRBA* polycistronic message.

1188

### 1189 **Mapping of 5'/3'-RACE Products**

1190 5'-RACE products generated from either primary or nested RACE reactions were  
1191 excised from the agarose gel and DNA was isolated using the NucleoSpin Gel and PCR  
1192 Clean-up kit (Macherey-Nagel, Takara Bio). The isolated RACE products were then  
1193 cloned into the pRACE vector supplied in the SMARTer® RACE 5'/3' Kit using the In-  
1194 Fusion HD cloning kit (Takara Bio). Ligated vectors were transformed into chemically  
1195 competent Stellar™ *E. coli* cells by heat shock. Transformed bacteria were plated on LB  
1196 agar containing 50  $\mu$ g/mL carbenicillin and incubated overnight at 37° C. Colonies were  
1197 selected and screened for relevant inserts by PCR. Positive colonies were cultured

1198 overnight at 37° C in LB liquid broth containing 50 µg/mL carbenicillin and plasmids  
1199 were isolated using the QIAprep Spin Miniprep kit (QIAGEN). Inserts were then  
1200 sequenced by Eurofins Genomics using the default M13 Reverse sequencing primer.  
1201 Returned sequencing data was aligned to the *C. trachomatis* L2 (434/Bu) genome  
1202 (NCBI Accession: NC\_010287) by BLAST and the most 5' aligned nucleotide was  
1203 considered the 5' end of the insert. In the case of 3'-RACE data, the reverse  
1204 complement sequence was first generated prior to alignment. Grouping of individual  
1205 products was determined 1.) by clusters being greater than 30 nucleotides apart and 2.)  
1206 by the specific RACE band that the alignment was derived from. These two criteria were  
1207 not both satisfied in all cases and in those cases criteria 1.) was favored.

1208

### 1209 **Sequence Alignments**

1210 All *C. trachomatis* L2 434/Bu genome sequences were obtained from NCBI Accession  
1211 NC\_010287. Global pairwise sequence alignments were made using the EMBOSS  
1212 Needle algorithm. Alignment parameters were set as follows: Matrix: DNAfull, Gap  
1213 Open: 20, Gap Extend: 0.8, Output Format: pair, End Gap Penalty: True, End Gap  
1214 Open: 10, End Gap Extend: 0.5. These conditions were sufficient to replicate the  
1215 previously published alignment between the putative YtgR operator sequence and the  
1216 TroR operator (Akers et al., 2011). Local pairwise sequence alignments were made  
1217 using the EMBOSS Water algorithm. The putative YtgR operator was aligned to the  
1218 entire 348 bp intergenic region of the *trpRBA* operon (*C. trachomatis* L2 [434/Bu]  
1219 genome position 511,692-512,039). The alignment parameters were set as follows:  
1220 Matrix: DNAfull, Gap Open:10, Gap Extend: 0.5, Output Format: pair. These are the  
1221 default conditions and were chosen to remove bias from the alignment results.

1222

### 1223 **Two-Plasmid Reporter Assay**

1224 The YtgR-binding reporter assay was performed essentially as described, with minor  
1225 modifications (Thompson et al., 2012). Promoter regions of interest were amplified from  
1226 the *C. trachomatis* L2 (434/Bu) genome by PCR using the indicated primer sets, which  
1227 included KpnI restriction endonuclease sites at the 5' and 3' ends of the promoter  
1228 amplicon. The amplified fragments and the pCCT-EV plasmid were then KpnI-digested  
1229 and the promoters ligated into the vector using T4 or Quick Ligase (New England  
1230 BioLabs). Insert directionality was confirmed by directional colony PCR and positive  
1231 clones were sequence verified. pCCT-*trpBA*ΔOperator was cloned by amplifying two  
1232 fragments of the pCCT-*trpBA* vector with one ~60mer primer containing the bases to be  
1233 substituted for each fragment. Thus, the whole vector was split into two half-fragments  
1234 containing the substituted bases. The two fragments were then cloned back together  
1235 using In-Fusion Homology-Directed cloning (Takara Bio) to yield the final vector.  
1236 Electrocompetent BL21(DE3) *E. coli* (Sigma Aldrich) were co-transformed by  
1237 electroporation with the pCCT reporter plasmid and the pET151 expression vector (-EV  
1238 or -YtgR) and plated on double selective LB agar containing 50 µg/mL carbenicillin and  
1239 15 µg/mL tetracycline. Prior to plating of transformed cells, 50 µL of 40 mg/mL X-Gal in  
1240 DMSO (EMD Millipore, Burlington, MA, USA) was applied to the plate for colorimetric  
1241 determination of β-galactosidase expression. Transformants were incubated overnight  
1242 at 37° C. The following evening, blue colonies from each experimental condition were  
1243 selected and cultured overnight in LB liquid broth containing 0.2% (w/v) D-glucose (for

1244 catabolite repression of expression vectors), 50 µg/mL carbenicillin and 15 µg/mL  
1245 tetracycline. Cultures were incubated overnight at 37° C. The following morning,  
1246 overnight cultures were spun down to remove glucose-containing media and sub-  
1247 cultured in LB liquid broth medium containing 50 µM FeSO<sub>4</sub>, 50 µg/mL carbenicillin and  
1248 15 µg/mL tetracycline to an OD<sub>600</sub> of 0.45. Cultures were incubated for 1 hour at 37° C  
1249 and sub-cultured a second time in the same media to an OD<sub>600</sub> of 0.1. Cultures were  
1250 returned to the incubator for another hour prior to the addition of 500 µM isopropyl β-D-  
1251 1-thiogalactopyranoside (IPTG) to induce pET151 expression from the *lac* promoter.  
1252 Cultures were incubated another hour prior to the addition of 0.2% L-arabinose to  
1253 induce *lacZ* expression from the *araBAD* promoter. Cultures were incubated a final 2  
1254 hours prior to the collection of a 0.1 mL volume of cells for assaying β-galactosidase  
1255 activity by the Miller Assay (J. H. Miller, 1972). Cell pellets were stored at -80° C prior to  
1256 being assayed. To assay β-galactosidase activity, cell pellets were first re-suspended in  
1257 Z-buffer (pH 7.0, 60 mM Na<sub>2</sub>HPO<sub>4</sub>, 40 mM NaH<sub>2</sub>PO<sub>4</sub>, 10 mM KCl, 1 mM MgSO<sub>4</sub> and 2.7  
1258 µL/mL β-mercaptoethanol). 50 µL of 0.1% SDS and 100 µL of chloroform were then  
1259 added to each sample prior to thorough vortexing. Samples were equilibrated for 5  
1260 minutes at 30° C and 200 µL of 4 mg/mL ortho-nitrophenyl-β-galactoside (ONPG)  
1261 prepared in Phosphate Buffer (pH 7.0, 60 mM Na<sub>2</sub>HPO<sub>4</sub>, 40 mM NaH<sub>2</sub>PO<sub>4</sub>) were added  
1262 to the samples to initiate the reaction. Reactions were stopped by the addition of 500 µL  
1263 1 M Na<sub>2</sub>CO<sub>3</sub>. Absorbance was measured on a FLUOStar Optima plate reader (BMG  
1264 Labtech, Offenburg, Germany) at 420 nm and Miller Units were calculated as:  
1265

$$1000 \times \frac{Abs_{420}}{t \times v \times OD_{final}}$$

1266  
1267  
1268 Where  $t$  = reaction time,  $v$  = volume of cells and  $OD_{final}$  = OD<sub>600</sub> at the time of sample  
1269 collection. It was empirically determined that the subtraction of absorbance at 550 nm  
1270 had a negligible effect on the calculated value. A blank sample lacking cells was  
1271 included in each experimental batch and used as a reference for absorbance. For each  
1272 experimental condition, three independent co-transformed colonies were assayed in  
1273 technical triplicate. In some instances, significantly high Miller Unit outliers were  
1274 excluded by Grubb's Test ( $p < 0.05$ ) under the assumption that extreme *lacZ* expression  
1275 may reflect plasmid copy number or reporter gene expression issues.  
1276

### 1277 RNA-Sequencing

1278 RNA-Sequencing experiments were performed as described in their original publication  
1279 (Brinkworth et al., 2018). Coverage maps were generated by mapping all reads across  
1280 three biological replicates to a single reference file in CLC Genomics Workbench v11.  
1281 To facilitate easy analysis of IGR boundaries, the *C. trachomatis* L2 434/Bu genome  
1282 (Accession: NC\_010287) was modified to contain annotations for non-operonic  
1283 intergenic regions, and this genome was used as the reference for read mapping. Read  
1284 mapping was performed using default settings in CLC Genomics Workbench. Data  
1285 aggregation in the Reads track was set to aggregate above 1bp.  
1286

### 1287 Graphs and Statistical Analysis



1288 All graphs were generated using the ggplot2 package (Wickham, 2009) in R Studio, in  
1289 Excel and/or in the Adobe Creative Suite. All line plots and bar graphs represent the  
1290 mean  $\pm$  one standard deviation unless otherwise noted. All box and whisker plots  
1291 represent the distribution of data between the 1<sup>st</sup> and 3<sup>rd</sup> quartile range within the box,  
1292 while the whiskers represent data within 1.5 interquartile ranges of the 1<sup>st</sup> or 3<sup>rd</sup> quartile.  
1293 Extreme values outside this range are plotted as open circles. The 2<sup>nd</sup> quartile (median)  
1294 is plotted as a black line within the box. Histogram plots were generated with a bin width  
1295 of 20 and are plotted on a density scale. The overlaid density plots represent a  
1296 statistical approximation of the data over a continuous scale. All statistical analyses  
1297 were carried out in R Studio. All statistical computations were performed on the mean  
1298 values of independent biological replicates calculated from the indicated number of  
1299 respective technical replicates. For single pairwise comparisons, a two-sided unpaired  
1300 Student's *t*-test with Welch's correction for unequal variance was used to determine  
1301 statistical significance. For multiple pairwise comparisons, a One-Way Analysis of  
1302 Variance (ANOVA) was conducted to identify significant differences within groups. If a  
1303 significant difference was detected, then the indicated post-hoc pairwise test was used  
1304 to identify the location of specific statistical differences. A *p*-value less than 0.05 was  
1305 considered statistically significant. For all figures, \* =  $p < 0.05$ , \*\* =  $p < 0.01$ , and \*\*\* =  $p$   
1306 < 0.005.

1307

1308 **Acknowledgements.** We thank Liam Caven, Korinn Murphy and Matthew Romero for  
1309 critical review of this manuscript; Dr. Christopher C. Thompson for the establishment of  
1310 the *E. coli* YtgR reporter system and generation of the pCCT construct; Dr. Scot P.  
1311 Ouellette for support, critical feedback and advice; and Dr. David Dewitt for expert  
1312 advice, training and maintenance of equipment in the IPN Advanced Imaging Center.  
1313 This work was supported by NIH grants R01-AI065545 to R.A.C.; 1F31AI136295 and  
1314 5T32GM008336 to N.D.P.; N.D.P. was also supported by an Achievement Reward for  
1315 College Scientists (ARCS; Seattle Chapter) Fellowship.

## 1316 **References**

1317 AbdelRahman, Y. M., & Belland, R. J. (2005). The chlamydial developmental cycle.  
1318 *FEMS Microbiology Reviews*, 29(5), 949–959.  
1319 <http://doi.org/10.1016/j.femsre.2005.03.002>  
1320 Akers, J. C., HoDac, H., Lathrop, R. H., & Tan, M. (2011). Identification and functional

- 1321 analysis of CT069 as a novel transcriptional regulator in Chlamydia. *Journal of*  
1322 *Bacteriology*, 193(22), 6123–6131. <http://doi.org/10.1128/JB.05976-11>
- 1323 Akers, J. C., & Tan, M. (2006). Molecular mechanism of tryptophan-dependent  
1324 transcriptional regulation in Chlamydia trachomatis. *Journal of Bacteriology*,  
1325 188(12), 4236–4243. <http://doi.org/10.1128/JB.01660-05>
- 1326 Belland, R. J., Nelson, D. E., Virok, D., Crane, D. D., Hogan, D., Sturdevant, D., ...  
1327 Caldwell, H. D. (2003). Transcriptome analysis of chlamydial growth during IFN-  
1328 gamma-mediated persistence and reactivation. *Proceedings of the National*  
1329 *Academy of Sciences of the United States of America*, 100(26), 15971–15976.  
1330 <http://doi.org/10.1073/pnas.2535394100>
- 1331 Brinkworth, A. J., Wildung, M. R., & Carabeo, R. A. (2018). Genomewide Transcriptional  
1332 Responses of Iron-Starved Chlamydia trachomatis Reveal Prioritization of  
1333 Metabolic Precursor Synthesis over Protein Translation. *MSystems*, 3(1), e00184-  
1334 17.
- 1335 Brown, S. A., Palmer, K. L., & Whiteley, M. (2008). Revisiting the host as a growth  
1336 medium. *Nature Reviews Microbiology*, 6(9), 657–666.  
1337 <http://doi.org/10.1038/nrmicro1955>
- 1338 Byrd, T. F., & Horwitz, M. A. (1993). Regulation of transferrin receptor expression and  
1339 ferritin content in human mononuclear phagocytes: Coordinate upregulation by iron  
1340 transferrin and downregulation by interferon gamma. *Journal of Clinical*  
1341 *Investigation*, 91(3), 969–976. <http://doi.org/10.1172/JCI116318>
- 1342 Byrd, T., & Horwitz, M. A. (1989). Interferon gamma-activated human monocytes  
1343 downregulate transferrin receptors and inhibit the intracellular multiplication of

- 1344 Legionella pneumophila by limiting the availability of iron. *Journal of Clinical*  
1345 *Investigation*, 83(5), 1457–1465. <http://doi.org/10.1172/JCI114038>
- 1346 Byrne, G. I., Lehmann, L. K., & Landry, G. J. (1986). Induction of tryptophan catabolism  
1347 is the mechanism for gamma-interferon-mediated inhibition of intracellular  
1348 Chlamydia psittaci replication in T24 cells. *Infection and Immunity*, 53(2), 347–351.
- 1349 Caldwell, H. D., Kromhout, J., & Schachter, J. (1981). Purification and partial  
1350 characterization of the major outer membrane protein of Chlamydia trachomatis.  
1351 *Infection and Immunity*, 31(3), 1161–1176.
- 1352 Carlson, J. H., Porcella, S. F., McClarty, G., & Caldwell, H. D. (2005). Comparative  
1353 Genomic Analysis of Chlamydia trachomatis Oculotropic and Genitotropic Strains.  
1354 *Infection and Immunity*, 73(10), 6407–6418. <http://doi.org/10.1128/IAI.73.10.6407>
- 1355 Carlson, J. H., Wood, H., Roshick, C., Caldwell, H. D., & McClarty, G. (2006). In vivo  
1356 and in vitro studies of Chlamydia trachomatis TrpR:DNA interactions. *Molecular*  
1357 *Microbiology*, 59(6), 1678–1691. <http://doi.org/10.1111/j.1365-2958.2006.05045.x>
- 1358 Case, E. D. R., Akers, J. C., & Tan, M. (2011). CT406 encodes a chlamydial ortholog of  
1359 NrdR, a repressor of ribonucleotide reductase. *Journal of Bacteriology*, 193(17),  
1360 4396–4404. <http://doi.org/10.1128/JB.00294-11>
- 1361 Cassat, J. E., & Skaar, E. P. (2013). Iron in Infection and Immunity. *Cell Host and*  
1362 *Microbe*, 13(5), 509–519. <http://doi.org/10.1016/j.chom.2013.04.010>
- 1363 CDC. (2017). 2016 Sexually Transmitted Diseases Surveillance - Chlamydia. Retrieved  
1364 from <https://www.cdc.gov/std/stats16/chlamydia.htm>
- 1365 Clarke, I. N. (2011). Evolution of Chlamydia trachomatis. *Annals of the New York*  
1366 *Academy of Sciences*, 1230, 11–18. <http://doi.org/10.1111/j.1749->

- 1367 6632.2011.06194.x
- 1368 Cohen, M., Britigan, B., French, M., & Bean, K. (1987). Preliminary observations on  
1369 lactoferrin secretion in human vaginal mucus: variation during the menstrual cycle,  
1370 evidence of hormonal regulation, and implications for infection with *Neisseria*  
1371 *gonorrhoeae*. *American Journal of Obstetrics and Gynecology*, 157(5), 1122–1125.
- 1372 Colin, J., Candelli, T., Porrua, O., Boulay, J., Zhu, C., Lacroute, F., ... Libri, D. (2014).  
1373 Roadblock termination by reb1p restricts cryptic and readthrough transcription.  
1374 *Molecular Cell*, 56(5), 667–680. <http://doi.org/10.1016/j.molcel.2014.10.026>
- 1375 Dill, B. D., Dessus-Babus, S., & Raulston, J. E. (2009). Identification of iron-responsive  
1376 proteins expressed by *Chlamydia trachomatis* reticulate bodies during intracellular  
1377 growth. *Microbiology*, 155(1), 210–219. <http://doi.org/10.1099/mic.0.022731-0>
- 1378 Eisenreich, W., Dandekar, T., Heesemann, J., & Goebel, W. (2010). Carbon metabolism  
1379 of intracellular bacterial pathogens and possible links to virulence. *Nature Reviews*  
1380 *Microbiology*, 8(6), 401–412. <http://doi.org/10.1038/nrmicro2351>
- 1381 Fehlner-Gardiner, C., Roshick, C., Carlson, J. H., Hughes, S., Belland, R. J., Caldwell,  
1382 H. D., & McClarty, G. (2002). Molecular basis defining human *Chlamydia*  
1383 *trachomatis* tissue tropism: A possible role for tryptophan synthase. *Journal of*  
1384 *Biological Chemistry*, 277(30), 26893–26903.  
1385 <http://doi.org/10.1074/jbc.M203937200>
- 1386 Gollnick, P., Babitzke, P., Antson, A., & Yanofsky, C. (2005). Complexity in regulation of  
1387 tryptophan biosynthesis in *Bacillus subtilis*. *Annual Review of Genetics*,  
1388 39(October), 47–68. <http://doi.org/10.1146/annurev.genet.39.073003.093745>
- 1389 Hafner, L. M. (2015). Pathogenesis of fallopian tube damage caused by *Chlamydia*

- 1390 trachomatis infections. *Contraception*, 92(2), 108–115.
- 1391 <http://doi.org/10.1016/j.contraception.2015.01.004>
- 1392 Hood, M. I., & Skaar, E. P. (2012). Nutritional immunity: Transition metals at the  
1393 pathogen-host interface. *Nature Reviews Microbiology*, 10(8), 525–537.
- 1394 <http://doi.org/10.1038/nrmicro2836>
- 1395 Igietseme, J. U., Ananaba, G. A., Candal, D. H., Lyn, D., & Black, C. M. (1998). Immune  
1396 control of Chlamydial growth in the human epithelial cell line RT4 involves multiple  
1397 mechanisms that include nitric oxide induction, tryptophan catabolism and iron  
1398 deprivation. *Microbiology and Immunology*, 42(9), 617–625.
- 1399 Kelper, M. E., Kaul, A., Nowicki, B., Findley, W. E., Hutchens, T. W., & Nagamani, M.  
1400 (1996). Estrogen regulation of lactoferrin expression in human endometrium.  
1401 *American Journal of Reproductive Immunology*, 36(5), 243–247.
- 1402 Lloyd, J. M., O'Dowd, T., Driver, M., & Tee, D. E. (1984). Demonstration of an epitope of  
1403 the transferrin receptor in human cervical epithelium--a potentially useful cell  
1404 marker. *Journal of Clinical Pathology*, 37(2), 131–135. Retrieved from  
1405 [http://www.ncbi.nlm.nih.gov/entrez/query.fcgi?cmd=Retrieve&db=PubMed&dopt=Ci](http://www.ncbi.nlm.nih.gov/entrez/query.fcgi?cmd=Retrieve&db=PubMed&dopt=Citation&list_uids=6198338)  
1406 [tation&list\\_uids=6198338](http://www.ncbi.nlm.nih.gov/entrez/query.fcgi?cmd=Retrieve&db=PubMed&dopt=Citation&list_uids=6198338)
- 1407 Macchiarulo, A., Camaioni, E., Nuti, R., & Pellicciari, R. (2009). Highlights at the gate of  
1408 tryptophan catabolism : a review on the mechanisms of activation and regulation of  
1409 indoleamine 2,3-dioxygenase (IDO), a novel target in cancer disease. *Amino Acids*,  
1410 37, 219–229. <http://doi.org/10.1007/s00726-008-0137-3>
- 1411 Merino, E., & Yanofsky, C. (2005). Transcription attenuation: A highly conserved  
1412 regulatory strategy used by bacteria. *Trends in Genetics*, 21(5), 260–264.

- 1413 <http://doi.org/10.1016/j.tig.2005.03.002>
- 1414 Miller, J. D., Sal, M. S., Schell, M., Whittimore, J. D., & Raulston, J. E. (2009).  
1415 Chlamydia trachomatis YtgA is an iron-binding periplasmic protein induced by iron  
1416 restriction. *Microbiology*, 155(9), 2884–2894. <http://doi.org/10.1099/mic.0.030247-0>
- 1417 Miller, J. H. (1972). Assay of  $\beta$ -galactosidase. In *Experiments in Molecular Genetics*.  
1418 Cold Spring Harbor Laboratory Press.
- 1419 Moore, E. R., & Ouellette, S. P. (2014). Reconceptualizing the chlamydial inclusion as a  
1420 pathogen-specified parasitic organelle: an expanded role for Inc proteins. *Frontiers*  
1421 *in Cellular and Infectious Microbiology*, 4(October), 1–10.  
1422 <http://doi.org/10.3389/fcimb.2014.00157>
- 1423 Mueller, K. E., Wolf, K., & Fields, K. A. (2016). Gene Deletion by Fluorescence-  
1424 Reported Allelic Exchange Mutagenesis in Chlamydia trachomatis. *MBio*, 7(1), 1–9.  
1425 <http://doi.org/10.1128/mBio.01817-15.Invited>
- 1426 Nairz, M., Fritsche, G., Brunner, P., Talasz, H., Hantke, K., & Weiss, G. (2008).  
1427 Interferon- $\gamma$  limits the availability of iron for intramacrophage Salmonella  
1428 typhimurium. *European Journal of Immunology*, 38(7), 1923–1936.  
1429 <http://doi.org/10.1002/eji.200738056>
- 1430 Nelson, D. E., Virok, D. P., Wood, H., Roshick, C., Johnson, R. M., Whitmire, W. M., ...  
1431 Caldwell, H. D. (2005). Chlamydial IFN-gamma immune evasion is linked to host  
1432 infection tropism. *Proceedings of the National Academy of Sciences of the United*  
1433 *States of America*, 102(30), 10658–63. <http://doi.org/10.1073/pnas.0504198102>
- 1434 Newman, L., Rowley, J., Hoorn, S. Vander, Wijesooriya, N. S., Unemo, M., Low, N., ...  
1435 Temmerman, M. (2015). Global Estimates of the Prevalence and Incidence of Four

- 1436 Curable Sexually Transmitted Infections in 2012 Based on Systematic Review and  
1437 Global Reporting. *PLoS ONE*, 10(12), 1–17.  
1438 <http://doi.org/10.1371/journal.pone.0143304>
- 1439 Nogueira, A. T., Braun, K. M., & Carabeo, R. A. (2017). Characterization of the Growth  
1440 of *Chlamydia trachomatis* in In Vitro-Generated Stratified Epithelium. *Frontiers in*  
1441 *Cellular and Infection Microbiology*, 7(October), 1–16.  
1442 <http://doi.org/10.3389/fcimb.2017.00438>
- 1443 Østergaard, O., Follmann, F., Olsen, A. W., Heegaard, N. H., Andersen, P., &  
1444 Rosenkrands, I. (2016). Quantitative Protein Profiling of *Chlamydia trachomatis*  
1445 Growth Forms Reveals Defense Strategies Against Tryptophan Starvation.  
1446 *Molecular & Cellular Proteomics : MCP*, 15(12), 3540–3550.  
1447 <http://doi.org/10.1074/mcp.M116.061986>
- 1448 Ouellette, S. P. (2018). Feasibility of a Conditional Knockout System for *Chlamydia*  
1449 Based on CRISPR Interference. *Frontiers in Cellular and Infection Microbiology*,  
1450 8(February). <http://doi.org/10.3389/fcimb.2018.00059>
- 1451 Ouellette, S. P., & Carabeo, R. A. (2010). A functional slow recycling pathway of  
1452 transferrin is required for growth of *Chlamydia*. *Frontiers in Microbiology*, 1(OCT),  
1453 1–12. <http://doi.org/10.3389/fmicb.2010.00112>
- 1454 Ouellette, S. P., Rueden, K. J., & Rucks, E. A. (2016). Tryptophan codon-dependent  
1455 transcription in *Chlamydia pneumoniae* during gamma interferon-mediated  
1456 tryptophan limitation. *Infection and Immunity*, 84(9), 2703–2713.  
1457 <http://doi.org/10.1128/IAI.00377-16>
- 1458 Pokorzynski, N. D., Thompson, C. C., & Carabeo, R. A. (2017). Ironing Out the

- 1459 Unconventional Mechanisms of Iron Acquisition and Gene Regulation in  
1460 Chlamydia. *Frontiers in Cellular and Infection Microbiology*, 7(September), 1–19.  
1461 <http://doi.org/10.3389/fcimb.2017.00394>
- 1462 Raulston, J. E. (1997). Response of Chlamydia trachomatis serovar E to iron restriction  
1463 in vitro and evidence for iron-regulated chlamydial proteins. *Infection and Immunity*,  
1464 65(11), 4539–4547.
- 1465 Raulston, J. E., Miller, J. D., Davis, C. H., Schell, M., Baldwin, A., Ferguson, K., & Lane,  
1466 H. (2007). Identification of an iron-responsive protein that is antigenic in patients  
1467 with Chlamydia trachomatis genital infections. *FEMS Immunology and Medical  
1468 Microbiology*, 51(3), 569–576. <http://doi.org/10.1111/j.1574-695X.2007.00336.x>
- 1469 Ray, K., Marteyn, B., Sansonetti, P. J., & Tang, C. M. (2009). Life on the inside: The  
1470 intracellular lifestyle of cytosolic bacteria. *Nature Reviews Microbiology*, 7(5), 333–  
1471 340. <http://doi.org/10.1038/nrmicro2112>
- 1472 Ricci, S., Ratti, G., & Scarlato, V. (1995). Transcriptional regulation in the Chlamydia  
1473 trachomatis pCT plasmid. *Gene*, 154(1), 93–98. [http://doi.org/10.1016/0378-  
1474 1119\(94\)00825-D](http://doi.org/10.1016/0378-1119(94)00825-D)
- 1475 Sasaki-Imamura, T., Yoshida, Y., Suwabe, K., Yoshimura, F., & Kato, H. (2011).  
1476 Molecular basis of indole production catalyzed by tryptophanase in the genus  
1477 Prevotella. *FEMS Microbiology Letters*, 322(1), 51–59.  
1478 <http://doi.org/10.1111/j.1574-6968.2011.02329.x>
- 1479 Schindelin, J., Arganda-Carreras, I., Frise, E., Kaynig, V., Longair, M., Pietzsch, T., ...  
1480 Cardona, A. (2012). Fiji: An open-source platform for biological-image analysis.  
1481 *Nature Methods*, 9(7), 676–682. <http://doi.org/10.1038/nmeth.2019>



- 1482 Schmitt, M. P. (2002). Analysis of a DtxR-Like Metalloregulatory Protein, MntR, from  
1483 *Corynebacterium diphtheriae* That Controls Expression of an ABC Metal  
1484 Transporter by an Mn(2+)-Dependent Mechanism. *Journal of Bacteriology*, 184(24),  
1485 6882–6892. <http://doi.org/10.1128/JB.184.24.6882>
- 1486 Seth-Smith, H. M. B., Harris, S. R., Persson, K., Marsh, P., Barron, A., Bignell, A., ...  
1487 Clarke, I. N. (2009). Co-evolution of genomes and plasmids within *Chlamydia*  
1488 *trachomatis* and the emergence in Sweden of a new variant strain. *BMC Genomics*,  
1489 10, 239. <http://doi.org/10.1186/1471-2164-10-239>
- 1490 Skaar, E. P. (2010). The battle for iron between bacterial pathogens and their vertebrate  
1491 hosts. *PLoS Pathogens*, 6(8), 1–2. <http://doi.org/10.1371/journal.ppat.1000949>
- 1492 Spear, G. T., Kendrick, S. R., Chen, H. Y., Thomas, T. T., Bahk, M., Balderas, R., ...  
1493 Landay, A. L. (2011). Multiplex immunoassay of lower genital tract mucosal fluid  
1494 from women attending an urban STD clinic shows broadly increased IL1 $\beta$  and  
1495 lactoferrin. *PLoS ONE*, 6(5), 1–7. <http://doi.org/10.1371/journal.pone.0019560>
- 1496 Stephens, R. S., Kalman, S., Lammel, C., Fan, J., Marathe, R., Aravind, L., ...  
1497 Gunderson, J. H. (1998). Genome sequence of an obligate intracellular pathogen of  
1498 humans: *Chlamydia trachomatis*. *Science*, 282(5389), 754–759.  
1499 <http://doi.org/10.1126/science.282.5389.754>
- 1500 Tao, X., Boydt, J., & Murphy, J. R. (1992). Specific binding of the diphtheria tox  
1501 regulatory element DtxR to the tox operator requires divalent heavy metal ions and  
1502 a 9-base-pair interrupted palindromic sequence. *Proceedings of the National*  
1503 *Academy of Sciences of the United States of America*, 89(13), 5897–5901.
- 1504 Taylor, H. R., Burton, M. J., Haddad, D., West, S., & Wright, H. (2014). Trachoma. *The*

- 1505 *Lancet*, 384(9960), 2142–2152. [http://doi.org/10.1016/S0140-6736\(13\)62182-0](http://doi.org/10.1016/S0140-6736(13)62182-0)
- 1506 Taylor, M. W., & Feng, G. S. (1991). Relationship between interferon-gamma,  
1507 indoleamine 2,3-dioxygenase, and tryptophan catabolism. *FASEB J.*, 5(11), 2516–  
1508 2522. Retrieved from <http://www.fasebj.org/cgi/reprint/5/11/2516.pdf>
- 1509 Thompson, C. C., & Carabeo, R. A. (2011). An optimal method of iron starvation of the  
1510 obligate intracellular pathogen, *Chlamydia trachomatis*. *Frontiers in Microbiology*,  
1511 2(20). <http://doi.org/10.3389/fmicb.2011.00020>
- 1512 Thompson, C. C., Nicod, S. S., Malcolm, D. S., Grieshaber, S. S., & Carabeo, R. A.  
1513 (2012). Cleavage of a putative metal permease in *Chlamydia trachomatis* yields an  
1514 iron-dependent transcriptional repressor. *Proceedings of the National Academy of*  
1515 *Sciences of the United States of America*, 109(26), 10546–51.  
1516 <http://doi.org/10.1073/pnas.1201398109>
- 1517 Thomson, N. R., Holden, M. T. G., Carder, C., Lennard, N., Lockey, S. J., Marsh, P., ...  
1518 Clarke, I. N. (2008). *Chlamydia trachomatis* : Genome sequence analysis of  
1519 lymphogranuloma venereum isolates. *Genome Research*, 18(1), 161–171.  
1520 <http://doi.org/10.1101/gr.7020108>.
- 1521 Valenti, P., Rosa, L., Capobianco, D., Lepanto, M. S., Schiavi, E., Cutone, A., ...  
1522 Mastromarino, P. (2018). Role of Lactobacilli and Lactoferrin in the Mucosal  
1523 Cervicovaginal Defense. *Frontiers in Immunology*, 9(March), 1–14.  
1524 <http://doi.org/10.3389/fimmu.2018.00376>
- 1525 Wickham, H. (2009). *ggplot2: Elegant Graphics for Data Analysis*. Springer-Verlag New  
1526 York.
- 1527 Wood, H., Fehlner-Gardner, C., Berry, J., Fischer, E., Graham, B., Hackstadt, T., ...

- 1528 McClarty, G. (2003). Regulation of tryptophan synthase gene expression in  
1529 Chlamydia trachomatis. *Molecular Microbiology*, 49(5), 1347–1359.  
1530 <http://doi.org/10.1046/j.1365-2958.2003.03638.x>
- 1531 Wood, H., Roshick, C., & McClarty, G. (2004). Tryptophan recycling is responsible for  
1532 the interferon- $\gamma$  resistance of Chlamydia psittaci GPIC in indoleamine dioxygenase-  
1533 expressing host cells. *Molecular Microbiology*, 52(3), 903–916.  
1534 <http://doi.org/10.1111/j.1365-2958.2004.04029.x>
- 1535 Wyrick, P. B. (2010). Chlamydia trachomatis Persistence In Vitro: An Overview. *The*  
1536 *Journal of Infectious Diseases*, 201, 88–95. <http://doi.org/10.1086/652394>
- 1537 Yanofsky, C. (1981). Attenuation in the control of expression of bacterial operons.  
1538 *Nature*, 289(5800), 751–758. <http://doi.org/10.1038/289751a0>
- 1539 Ziklo, N., Huston, W. M., Hocking, J. S., & Timms, P. (2016). Chlamydia trachomatis  
1540 Genital Tract Infections: When Host Immune Response and the Microbiome  
1541 Collide. *Trends in Microbiology*, 24(9), 750–765.  
1542 <http://doi.org/10.1016/j.tim.2016.05.007>
- 1543
- 1544 **Author Contributions:** N.D.P. and R.A.C. wrote the manuscript; A.J.B. and R.A.C.  
1545 designed and analyzed data for the RNA-Sequencing experiments; A.J.B.  
1546 performed RNA-Seq experiments; N.D.P. and R.A.C. re-analyzed the RNA-  
1547 Sequencing data for this publication; N.D.P. and R.A.C. designed all other  
1548 experiments; N.D.P. performed all other experiments; N.D.P. and R.A.C. analyzed  
1549 and interpreted the data for all other experiments.
- 1550

1551 **Supplementary Figures**

1552  
1553  
1554  
1555  
1556  
1557  
1558  
1559  
1560  
1561  
1562  
1563  
1564  
1565  
1566  
1567  
1568  
1569  
1570  
1571  
1572  
1573  
1574  
1575  
1576  
1577  
1578  
1579  
1580  
1581  
1582  
1583  
1584  
1585  
1586  
1587  
1588  
1589  
1590  
1591  
1592  
1593  
1594  
1595  
1596  
1597  
1598

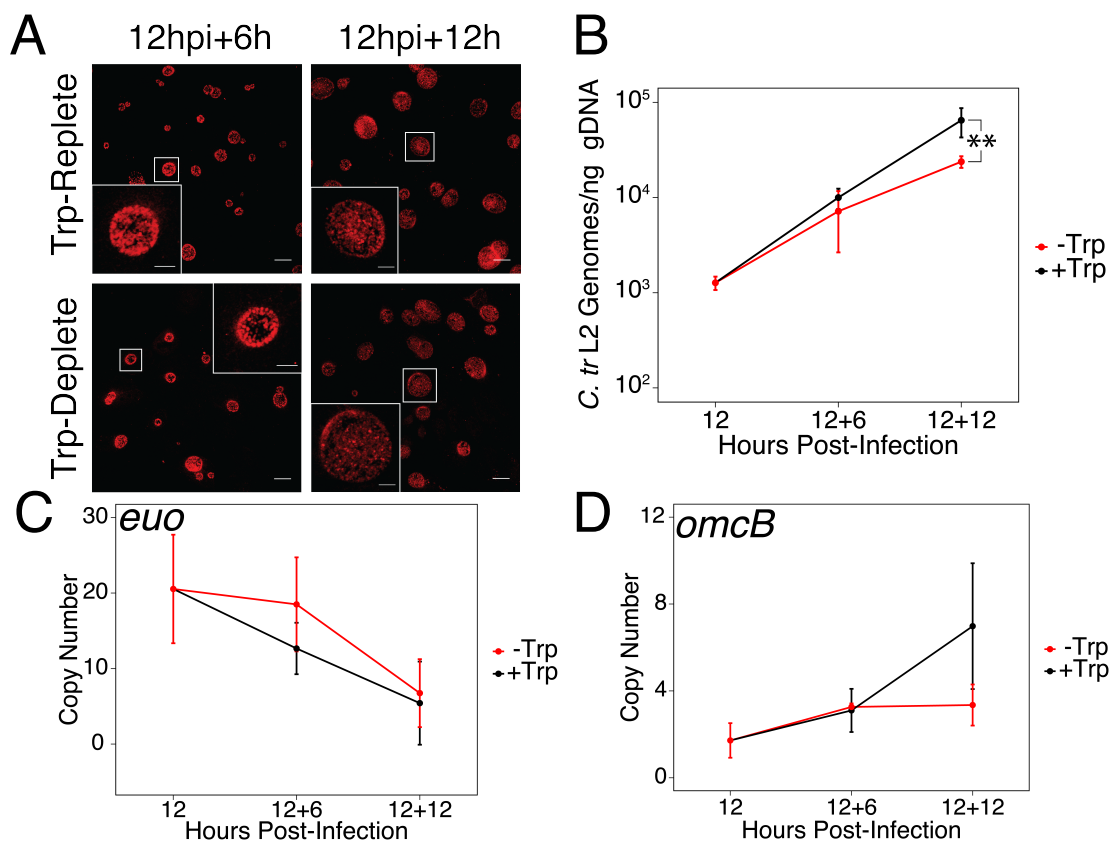

**Figure 1 – Figure Supplement 1.** Brief media-defined tryptophan limitation does not produce characteristically persistent *Chlamydia*. (A) *C. trachomatis* L2-infected HeLa cells were fixed and stained with convalescent human sera to image inclusion morphology by confocal microscopy following tryptophan limitation at the indicated times post-infection. Figure shows representative experiment of two biological replicates. Scale bar = 15  $\mu$ m, Inset scale bar = 5  $\mu$ m. (B) Genomic DNA (gDNA) was harvested from infected HeLa cells at the indicated times post-infection under tryptophan-replete (black) and -deplete (red) conditions. Chlamydial genome copy number was quantified by qPCR. Chlamydial genome replication is stalled following 12 hours of tryptophan limitation, but not 6. N=2. (C) Total RNA was harvested from infected HeLa cells at the indicated times post-infection under tryptophan-replete (black) and -deplete (red) conditions. The transcript abundance of hallmark persistence genes *euo* and (D) *omcB* were quantified by RT-qPCR and normalized against genome copy number. No period of tryptophan limitation significantly impacted *euo* or *omcB* expression. N=2. Statistical significance was determined by One-Way ANOVA followed by post-hoc pairwise *t*-tests with Bonferroni's correction for multiple comparisons.

1599  
1600  
1601  
1602  
1603  
1604  
1605  
1606  
1607  
1608  
1609  
1610  
1611  
1612  
1613  
1614  
1615  
1616  
1617  
1618  
1619  
1620  
1621  
1622  
1623  
1624  
1625  
1626  
1627  
1628  
1629  
1630  
1631  
1632  
1633  
1634  
1635  
1636  
1637  
1638  
1639  
1640  
1641  
1642  
1643  
1644

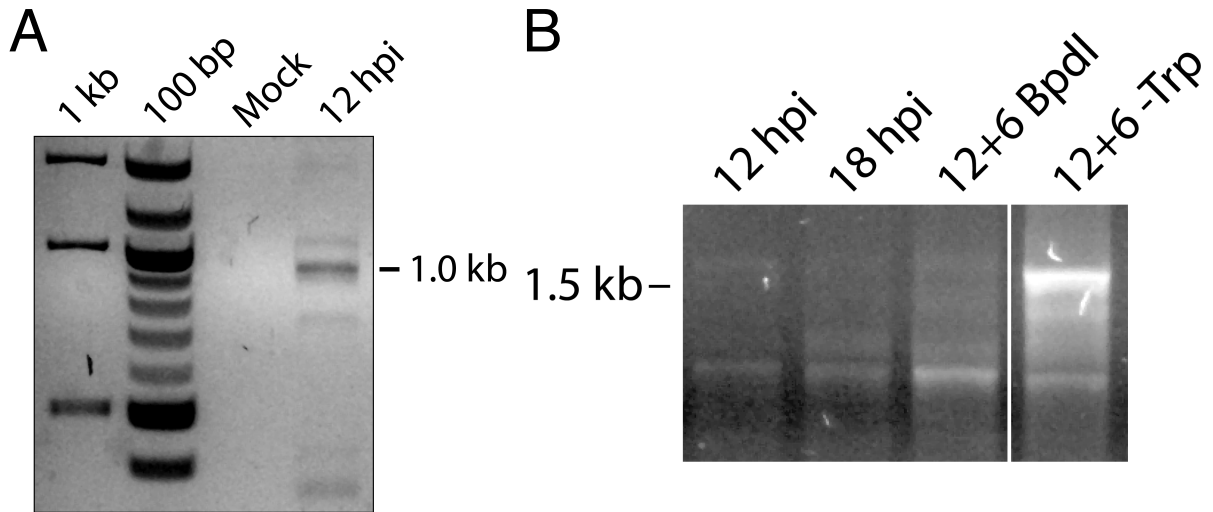

**Figure 4 – Figure Supplement 1.** 5'-RACE conditions produce *Chlamydia*-specific products that are amplified in primary RACE. (A) Total RNA harvested from mock-infected HeLa cells was processed for 5'-RACE in parallel with infected samples to determine specificity of amplified products to *Chlamydia*-infected cells. No RACE products were detected in the mock-infected sample. (B) Primary products amplified from 5'-RACE were electrophoresed on an agarose gel and visualized. Weak bands corresponding to those detected by nested 5'-RACE were observed, with the noted relative abundance of the 1.0 and 1.5 kb products in the Bpdl-treated and Trp-deplete conditions, respectively.

1645  
1646  
1647  
1648  
1649  
1650  
1651  
1652  
1653  
1654  
1655  
1656  
1657  
1658  
1659  
1660  
1661  
1662  
1663  
1664  
1665  
1666  
1667  
1668  
1669  
1670  
1671  
1672  
1673  
1674  
1675  
1676  
1677  
1678  
1679  
1680  
1681  
1682  
1683  
1684  
1685  
1686  
1687  
1688  
1689  
1690  
1691  
1692  
1693  
1694

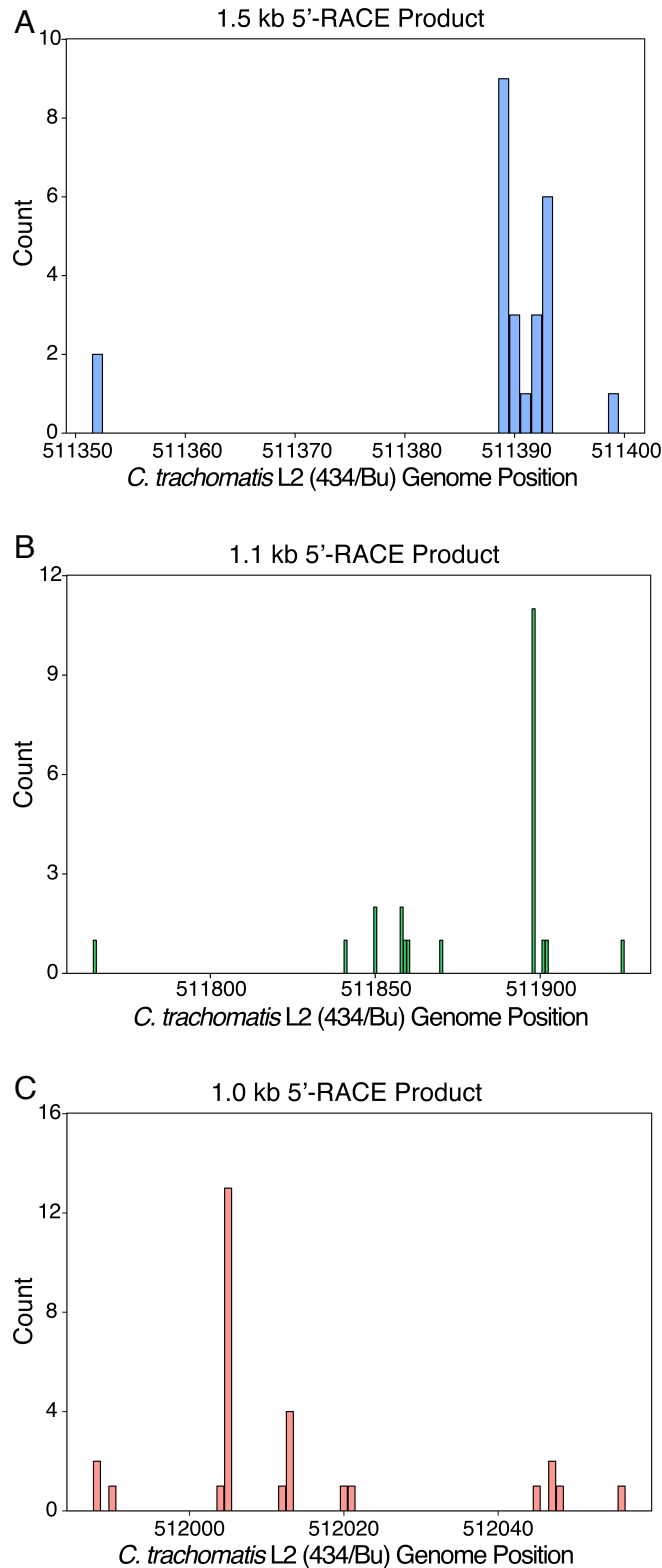

**Figure 4 – Figure Supplement 2.** Mapping of 5'-RACE products at the individual nucleotide level. (A) Mapping of the 1.5 kb 5'-RACE product. (B) Mapping of the 1.1 kb 5'-RACE product. (C) Mapping of the 1.0 kb 5'-RACE product.

1695  
1696  
1697  
1698  
1699  
1700  
1701  
1702  
1703  
1704  
1705  
1706  
1707  
1708  
1709  
1710  
1711  
1712  
1713  
1714  
1715  
1716  
1717  
1718  
1719  
1720  
1721  
1722  
1723  
1724  
1725  
1726  
1727  
1728  
1729  
1730  
1731  
1732  
1733  
1734  
1735  
1736  
1737  
1738

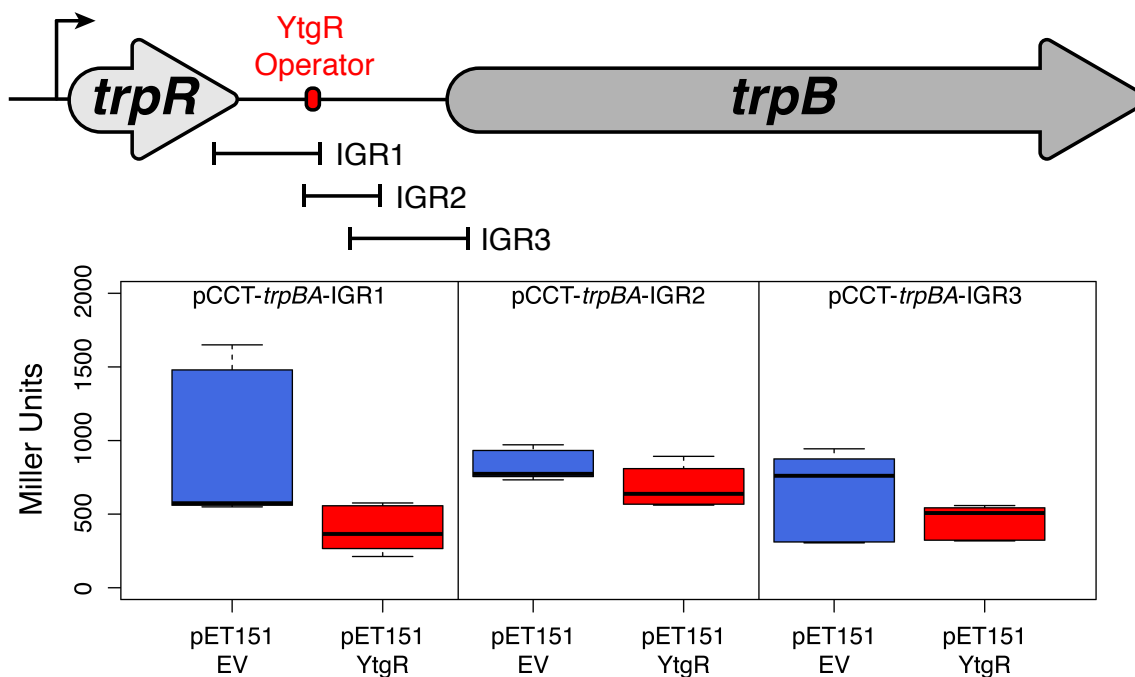

1739 **Figure 5 – Figure Supplement 1.** Truncated fragments of the *trpRBA* IGR are not  
1740 sufficient to confer YtgR repression phenotype, regardless of the presence of the  
1741 putative operator site. The cartoon depiction of the *trpRBA* operon indicates the position  
1742 of the IGR fragments cloned into each of the reporter vectors (*i.e.* pCCT-IGR1 through  
1743 IGR3). No statistically meaningful differences were detected in the  $\beta$ -galactosidase  
1744 activity in the presence of any of the IGR fragments.

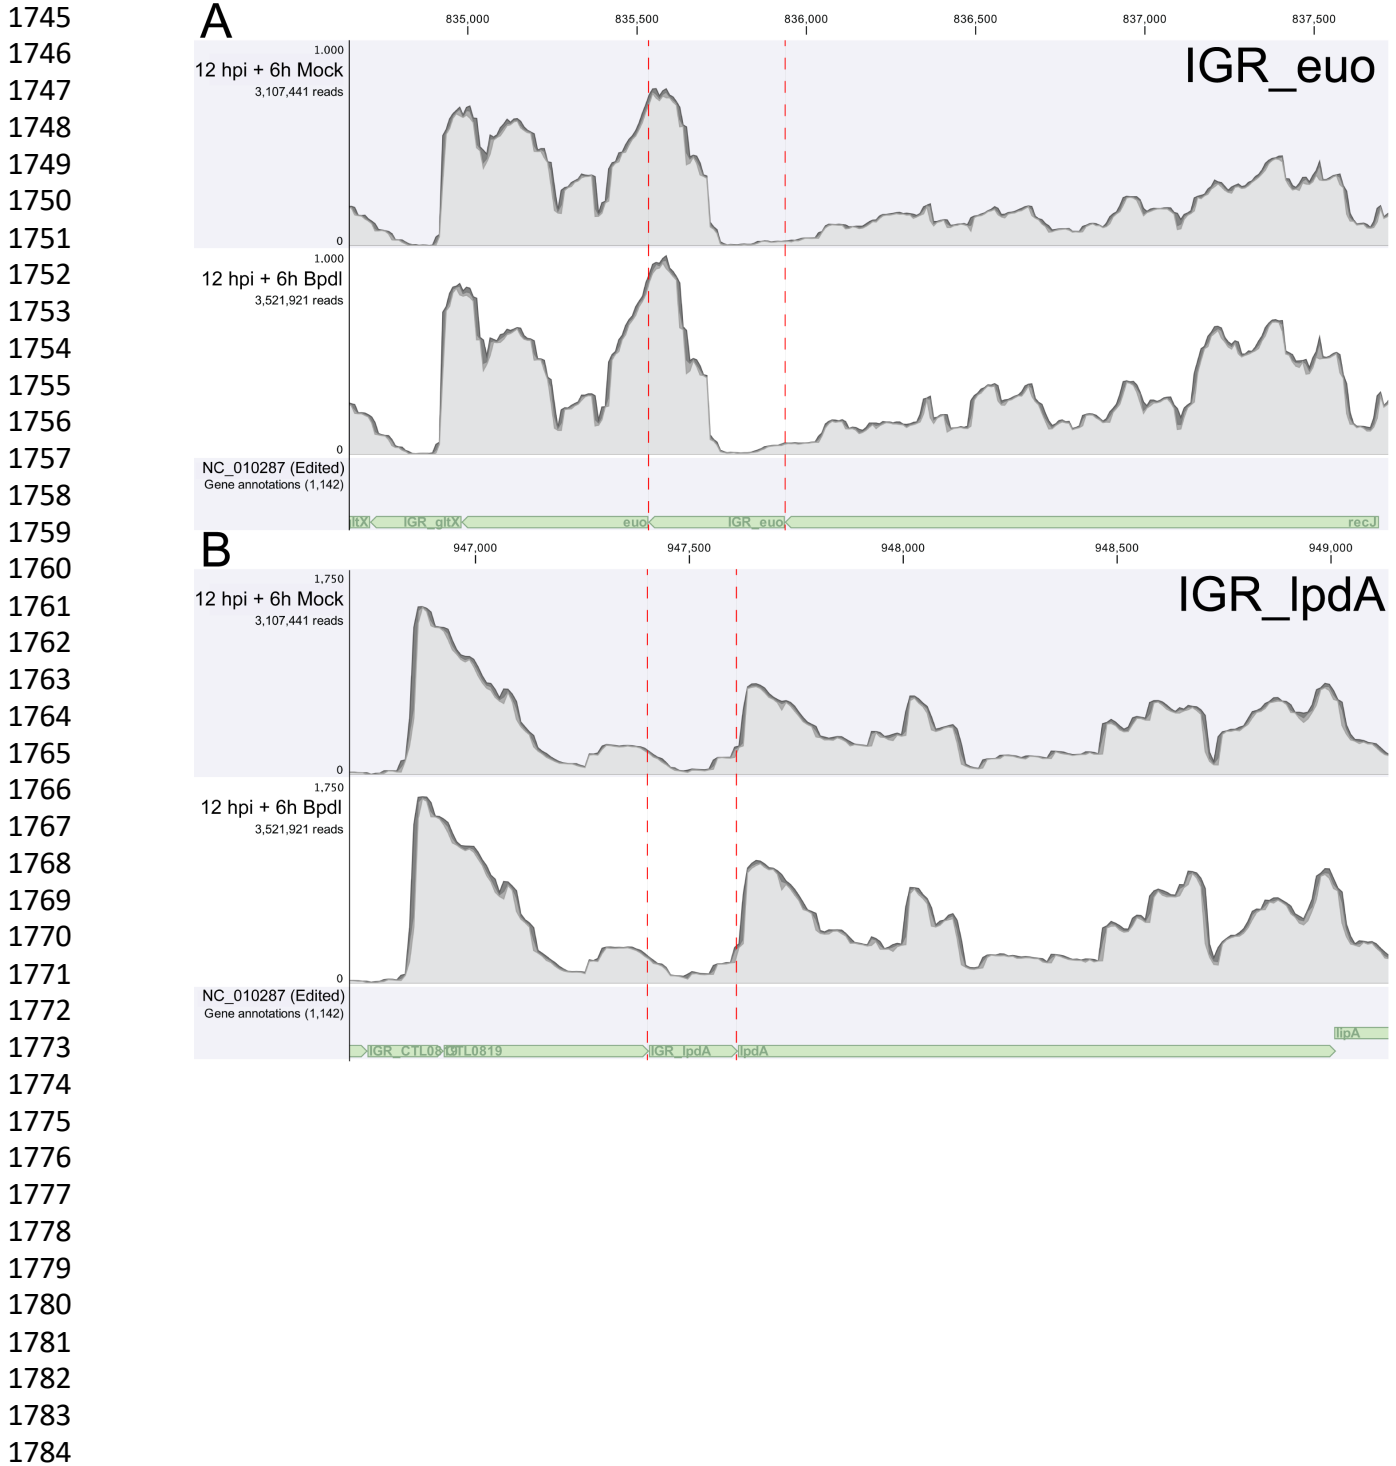

1785 **Figure 6 – Figure Supplement 1.** RNA-Sequencing coverage map of reads mapping to  
1786 the intergenic regions upstream of *euo* and *lpdA*. (A) Coverage map for the IGR  
1787 upstream of *euo*, a gene that is neither iron-regulated nor YtgR-regulated. (B) Coverage  
1788 map for the IGR upstream of *lpdA*, a gene that is iron-regulated but not YtgR-regulated.  
1789 Neither coverage map indicates an increase in reads mapping to these intergenic  
1790 regions, suggesting that the effect observed at the *trpRBA* IGR is specific.



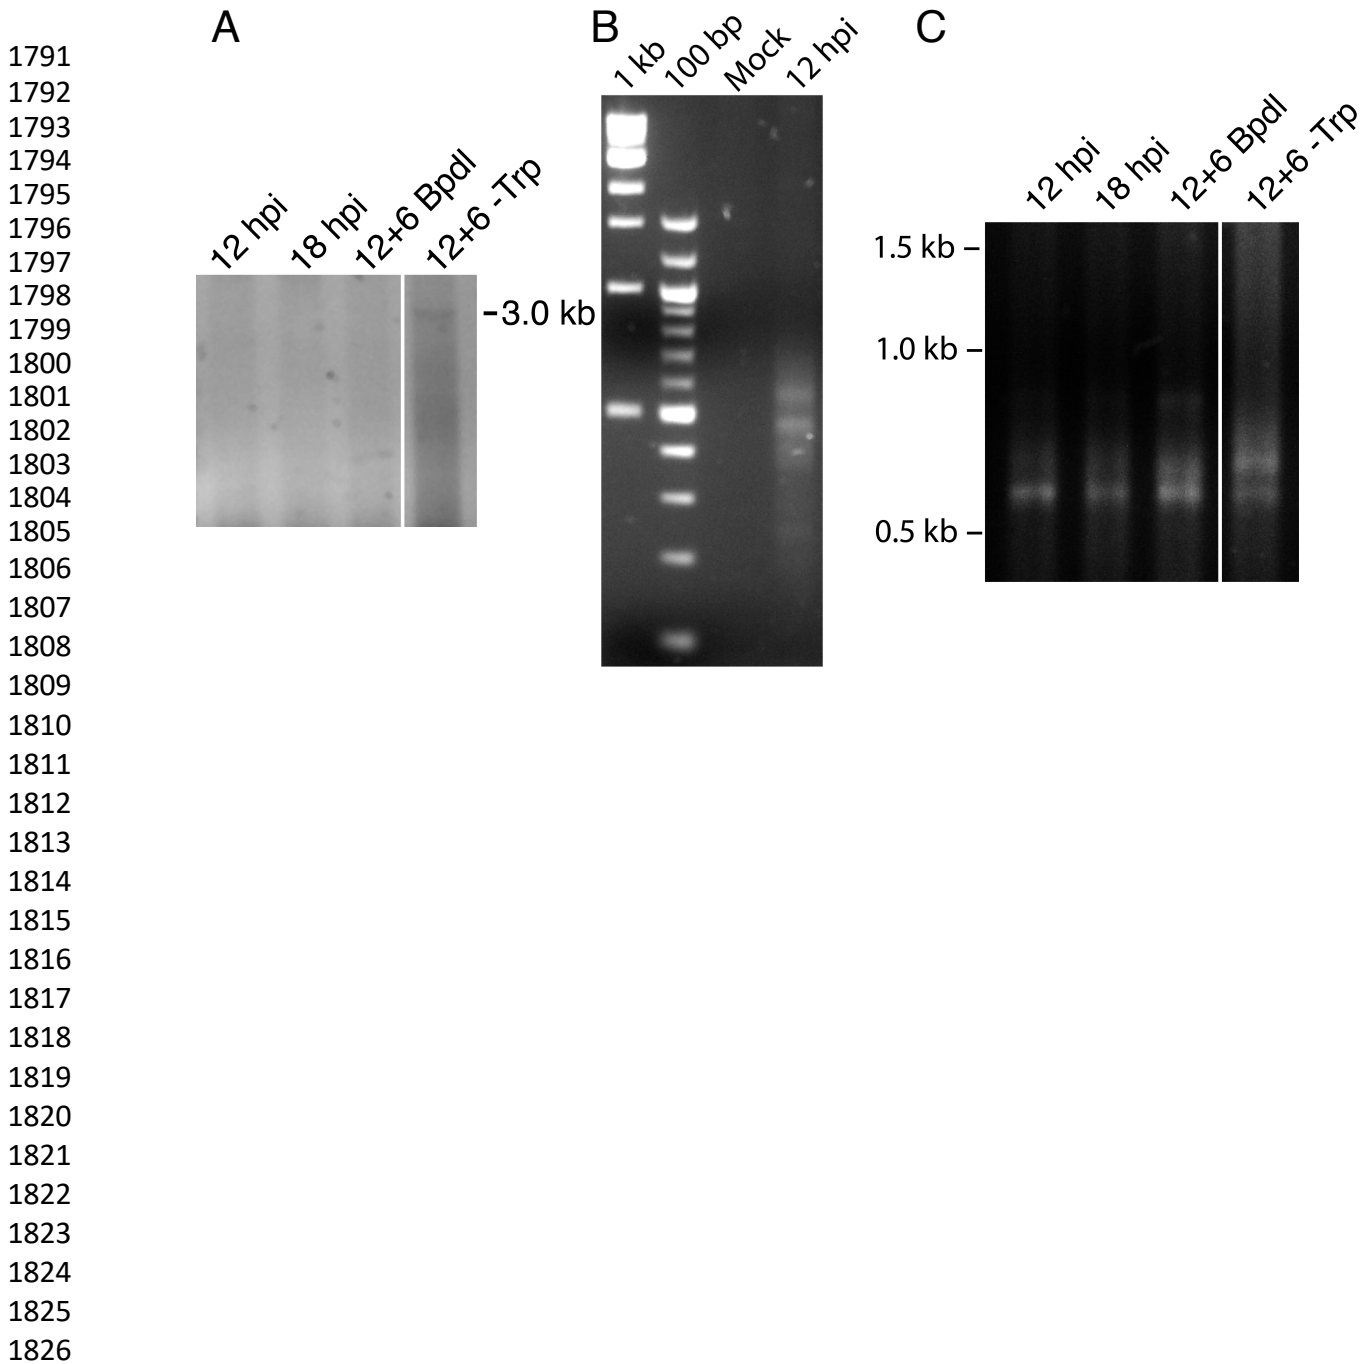

1827 **Figure 6 – Figure Supplement 2.** 3'-RACE conditions produce *Chlamydia*-specific  
1828 products that are amplified in primary RACE. (A) Contrast-adjusted image to show weak  
1829 amplification of ~3.0 kb full-length *trpRBA* transcript in nested 3'-RACE reaction. (B)  
1830 Total RNA harvested from mock-infected HeLa cells was processed for 3'-RACE in  
1831 parallel with infected samples to determine specificity of amplified products to  
1832 *Chlamydia*-infected cells. No RACE products were detected in the mock-infected  
1833 sample. (C) Primary products amplified from 3'-RACE were electrophoresed on an  
1834 agarose gel and visualized. Weak bands that were relatively non-specific were detected  
1835 in the 3'-RACE primary amplification, emphasizing the utility of producing enhanced  
1836 specificity in the nested amplification.

1837  
1838  
1839  
1840  
1841  
1842  
1843  
1844  
1845  
1846  
1847  
1848  
1849  
1850  
1851  
1852  
1853  
1854  
1855  
1856  
1857  
1858  
1859  
1860  
1861  
1862  
1863  
1864  
1865  
1866  
1867  
1868  
1869  
1870  
1871  
1872  
1873  
1874  
1875  
1876  
1877  
1878

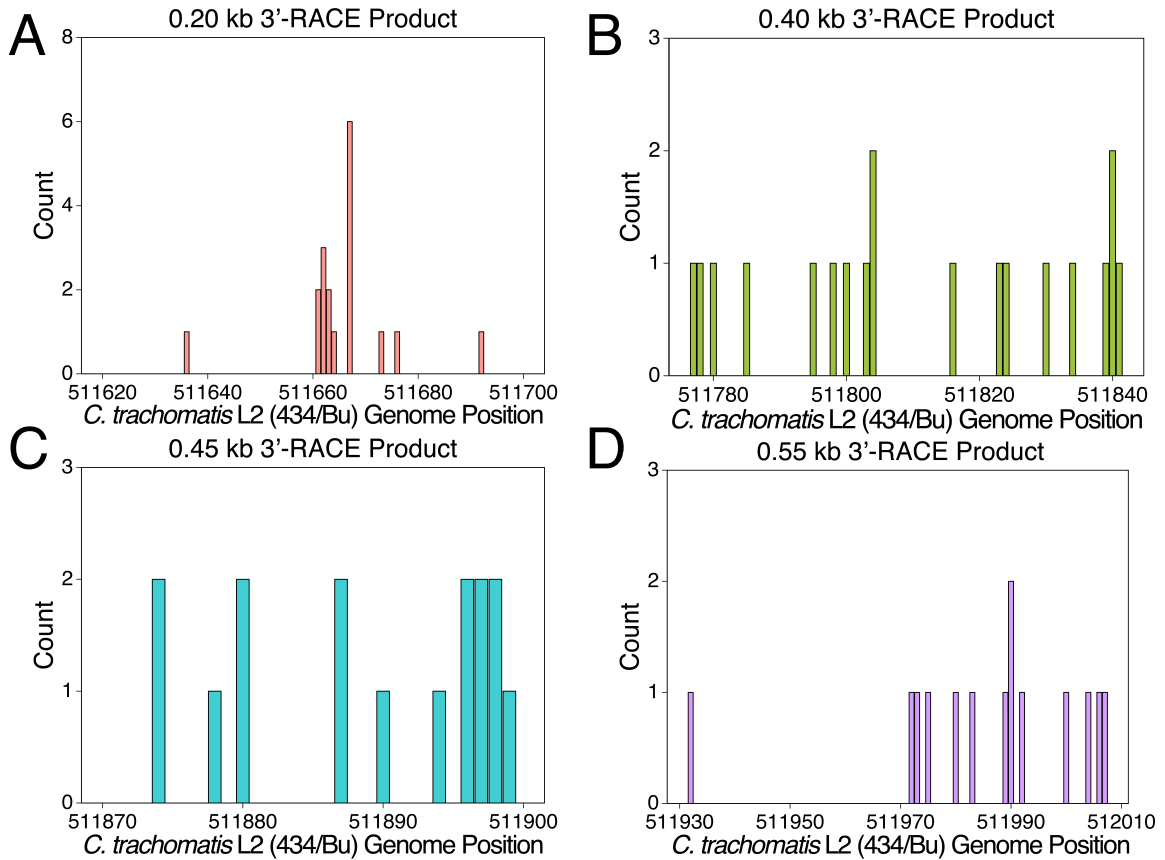

1879 **Figure 6 – Figure Supplement 3.** Mapping of the 3'-RACE products at the individual  
1880 nucleotide level. (A) Mapping of the 0.20 kb 3'-RACE product. (B) Mapping of the 0.40  
1881 kb 3'-RACE product. (C) Mapping of the 0.45 kb 3'-RACE product. (D) Mapping of the  
1882 0.55 kb 3'-RACE product.
